# Supplementary material
Source: publisher figshare collection journal article supplement (https://gsajournals.figshare.com/ndownloader/files/26073878)
Supplement: Supplementary file 1 [file 26073878]

Test	Rep	TestCol	TestRow	RepCol	RepRow	CloneID	Female	Male	Cross	Rust	Forking
Site1	1	1	1	1	1	V1467	18	5	18x5	0	1
Site1	1	1	2	1	2	V1389	18	5	18x5	0	1
Site1	1	1	3	1	3	V1477	18	5	18x5	0	1
Site1	1	1	4	1	4	V1487	18	5	18x5	0	1
Site1	1	1	6	1	6	V1325	18	5	18x5	0	1
Site1	1	1	7	1	7	V1789	21	22	21x22	0	1
Site1	1	1	10	1	10	V5	21	6	21x6	0	1
Site1	1	1	11	1	11	V20	22	6	22x6	0	1
Site1	1	1	12	1	12	V1822	12	5	12x5	0	1
Site1	1	1	13	1	13	V1382	18	5	18x5	0	1
Site1	1	1	15	1	15	V1845	5	17	5x17	0	1
Site1	1	1	16	1	16	V1790	21	22	21x22	1	1
Site1	1	1	17	1	17	V883	18	5	18x5	0	1
Site1	1	1	19	1	19	V1330	18	5	18x5	0	1
Site1	1	1	20	1	20	V1352	18	5	18x5	0	1
Site1	1	1	21	1	21	V1472	18	5	18x5	0	1
Site1	1	1	22	1	22	V1385	18	5	18x5	0	1
Site1	2	1	25	1	1	V1345	18	5	18x5	0	1
Site1	2	1	28	1	4	V1288	9	22	9x22	0	1
Site1	2	1	29	1	5	V1467	18	5	18x5	0	1
Site1	2	1	32	1	8	V1352	18	5	18x5	0	1
Site1	2	1	33	1	9	V19	12	6	12x6	0	1
Site1	2	1	35	1	11	V1513	14	5	14x5	0	1
Site1	2	1	37	1	13	V1514	5	14	5x14	0	1
Site1	2	1	39	1	15	V1376	18	5	18x5	0	1
Site1	2	1	40	1	16	V1832	18	5	18x5	0	1
Site1	2	1	41	1	17	V1764	5	17	5x17	0	1
Site1	2	1	42	1	18	V1286	9	22	9x22	0	1
Site1	2	1	44	1	20	V1425	18	5	18x5	0	1
Site1	2	1	45	1	21	V1433	18	5	18x5	0	1
Site1	3	1	49	1	1	V1519	5	14	5x14	0	1
Site1	3	1	51	1	3	V1448	18	5	18x5	0	1
Site1	3	1	52	1	4	V1570	5	14	5x14	0	1
Site1	3	1	53	1	5	V1836	18	5	18x5	0	0
Site1	3	1	55	1	7	V1325	18	5	18x5	0	0
Site1	3	1	56	1	8	V1379	18	5	18x5	0	1
Site1	3	1	59	1	11	V1276	9	22	9x22	0	1
Site1	3	1	60	1	12	V1410	18	5	18x5	0	1
Site1	3	1	61	1	13	V1648	5	14	5x14	1	1
Site1	3	1	62	1	14	V1769	27	0	27x.	0	1
Site1	3	1	63	1	15	V1474	18	5	18x5	0	0
Site1	3	1	64	1	16	V1476	18	5	18x5	0	0
Site1	3	1	65	1	17	V1319	18	5	18x5	0	1
Site1	3	1	66	1	18	V1812	21	22	21x22	1	1
Site1	3	1	67	1	19	V1362	18	5	18x5	0	1
Site1	3	1	68	1	20	V1818	21	22	21x22	1	1
Site1	3	1	69	1	21	V1333	18	5	18x5	1	1
Site1	3	1	71	1	23	V1421	18	5	18x5	0	1
Site1	4	1	73	1	1	V3	21	6	21x6	0	0
Site1	4	1	74	1	2	V1629	5	14	5x14	0	1
Site1	4	1	75	1	3	V1356	18	5	18x5	0	1
Site1	4	1	76	1	4	V1771	5	17	5x17	0	1
Site1	4	1	78	1	6	V1331	18	5	18x5	0	1
Site1	4	1	80	1	8	V1391	18	5	18x5	0	1
Site1	4	1	81	1	9	V1338	18	5	18x5	0	1
Site1	4	1	82	1	10	V1292	9	22	9x22	1	0
Site1	4	1	83	1	11	V1462	18	5	18x5	0	1
Site1	4	1	85	1	13	V1447	18	5	18x5	0	1
Site1	4	1	86	1	14	V1339	18	5	18x5	0	1
Site1	4	1	88	1	16	V1283	9	22	9x22	0	1
Site1	4	1	89	1	17	V1401	18	5	18x5	0	1
Site1	4	1	90	1	18	V1324	18	5	18x5	0	1
Site1	4	1	91	1	19	V1458	18	5	18x5	0	1
Site1	4	1	93	1	21	V1833	18	5	18x5	0	1
Site1	4	1	95	1	23	V1569	5	14	5x14	0	1
Site1	4	1	96	1	24	V1459	18	5	18x5	0	1
Site1	5	1	97	1	1	V1389	18	5	18x5	0	1
Site1	5	1	99	1	3	V1659	5	14	5x14	0	1
Site1	5	1	101	1	5	V1810	21	5	21x5	0	1
Site1	5	1	102	1	6	V1594	5	14	5x14	0	1
Site1	5	1	103	1	7	V1359	18	5	18x5	1	1
Site1	5	1	104	1	8	V1340	18	5	18x5	0	1
Site1	5	1	108	1	12	V1350	18	5	18x5	0	1
Site1	5	1	109	1	13	V1554	5	14	5x14	0	1
Site1	5	1	110	1	14	V1790	21	22	21x22	0	1
Site1	5	1	113	1	17	V1414	18	5	18x5	0	1
Site1	5	1	116	1	20	V1518	5	14	5x14	0	1
Site1	5	1	117	1	21	V1391	18	5	18x5	0	1
Site1	5	1	118	1	22	V1476	18	5	18x5	0	1
Site1	5	1	120	1	24	V1808	21	22	21x22	1	1
Site1	6	1	121	1	1	V1809	21	22	21x22	0	0
Site1	6	1	122	1	2	V1603	5	14	5x14	0	1
Site1	6	1	123	1	3	V1341	18	5	18x5	0	1
Site1	6	1	124	1	4	V1780	21	22	21x22	0	1
Site1	6	1	125	1	5	V1425	18	5	18x5	0	1
Site1	6	1	126	1	6	V1334	18	5	18x5	0	1
Site1	6	1	127	1	7	V1808	21	22	21x22	1	0
Site1	6	1	128	1	8	V1304	9	22	9x22	0	1
Site1	6	1	129	1	9	V1353	18	5	18x5	0	1
Site1	6	1	130	1	10	V1355	18	5	18x5	0	1
Site1	6	1	133	1	13	V1367	18	5	18x5	0	1
Site1	6	1	134	1	14	V1476	18	5	18x5	0	1
Site1	6	1	135	1	15	V1569	5	14	5x14	1	1
Site1	6	1	136	1	16	V1411	18	5	18x5	0	1
Site1	6	1	137	1	17	V1426	18	5	18x5	0	1
Site1	6	1	138	1	18	V1563	5	14	5x14	1	1
Site1	6	1	140	1	20	V1383	18	5	18x5	0	1
Site1	6	1	141	1	21	V1403	18	5	18x5	0	0
Site1	6	1	143	1	23	V1288	9	22	9x22	0	1
Site1	6	1	144	1	24	V1483	18	5	18x5	0	1
Site1	1	2	3	2	3	V1840	22	0	22x.	0	0
Site1	1	2	4	2	4	V1486	18	5	18x5	0	1
Site1	1	2	5	2	5	V1331	18	5	18x5	0	1
Site1	1	2	7	2	7	V1527	5	14	5x14	0	1
Site1	1	2	8	2	8	V1761	21	22	21x22	0	1
Site1	1	2	9	2	9	V1440	18	5	18x5	0	1
Site1	1	2	11	2	11	V1519	5	14	5x14	0	1
Site1	1	2	13	2	13	V1762	5	12	5x12	0	1
Site1	1	2	14	2	14	V1434	18	5	18x5	0	1
Site1	1	2	16	2	16	V1542	5	14	5x14	0	1
Site1	1	2	17	2	17	V1377	18	5	18x5	0	1
Site1	1	2	18	2	18	V1484	18	5	18x5	0	1
Site1	1	2	19	2	19	V1333	18	5	18x5	0	1
Site1	1	2	21	2	21	V1283	9	22	9x22	0	1
Site1	1	2	22	2	22	V1663	5	14	5x14	0	1
Site1	1	2	24	2	24	V1763	5	20	5x20	1	1
Site1	2	2	25	2	1	V1494	18	5	18x5	0	1
Site1	2	2	26	2	2	V1542	5	14	5x14	0	1
Site1	2	2	28	2	4	V1424	18	5	18x5	0	0
Site1	2	2	36	2	12	V1340	18	5	18x5	0	1
Site1	2	2	37	2	13	V1417	18	5	18x5	0	1
Site1	2	2	39	2	15	V1447	18	5	18x5	0	1
Site1	2	2	40	2	16	V1503	14	5	14x5	1	1
Site1	2	2	41	2	17	V1389	18	5	18x5	0	1
Site1	2	2	42	2	18	V1367	18	5	18x5	0	1
Site1	2	2	43	2	19	V1395	18	5	18x5	0	0
Site1	2	2	44	2	20	V1816	21	22	21x22	0	1
Site1	2	2	45	2	21	V1394	18	5	18x5	0	1
Site1	2	2	46	2	22	V1632	5	14	5x14	0	1
Site1	2	2	47	2	23	V1455	18	5	18x5	0	1
Site1	3	2	49	2	1	V1380	18	5	18x5	0	1
Site1	3	2	50	2	2	V1798	22	0	22x.	0	0
Site1	3	2	51	2	3	V1773	14	0	14x.	0	1
Site1	3	2	52	2	4	V1832	18	5	18x5	0	1
Site1	3	2	55	2	7	V1810	21	5	21x5	0	1
Site1	3	2	57	2	9	V1493	18	5	18x5	0	1
Site1	3	2	58	2	10	V1323	18	5	18x5	0	1
Site1	3	2	60	2	12	V1414	18	5	18x5	0	1
Site1	3	2	61	2	13	V1834	18	5	18x5	1	0
Site1	3	2	62	2	14	V12	21	5	21x5	0	1
Site1	3	2	63	2	15	V11	21	5	21x5	0	1
Site1	3	2	64	2	16	V1316	9	22	9x22	0	1
Site1	3	2	66	2	18	V1786	21	22	21x22	0	1
Site1	3	2	68	2	20	V1833	18	5	18x5	0	1
Site1	3	2	69	2	21	V1500	14	5	14x5	0	1
Site1	3	2	70	2	22	V1447	18	5	18x5	0	1
Site1	4	2	74	2	2	V1829	18	5	18x5	0	1
Site1	4	2	75	2	3	V1648	5	14	5x14	0	1
Site1	4	2	76	2	4	V1783	21	22	21x22	1	1
Site1	4	2	78	2	6	V878	18	5	18x5	0	1
Site1	4	2	79	2	7	V1563	5	14	5x14	1	0
Site1	4	2	81	2	9	V1803	12	5	12x5	0	1
Site1	4	2	82	2	10	V1804	12	0	12x.	0	1
Site1	4	2	83	2	11	V1570	5	14	5x14	0	1
Site1	4	2	84	2	12	V1424	18	5	18x5	0	1
Site1	4	2	85	2	13	V1431	18	5	18x5	1	1
Site1	4	2	86	2	14	V1639	5	14	5x14	0	1
Site1	4	2	87	2	15	V1791	21	22	21x22	0	1
Site1	4	2	89	2	17	V1419	18	5	18x5	0	1
Site1	4	2	91	2	19	V1405	18	5	18x5	0	1
Site1	4	2	92	2	20	V1346	18	5	18x5	0	1
Site1	4	2	93	2	21	V1343	18	5	18x5	0	1
Site1	4	2	96	2	24	V1332	18	5	18x5	0	1
Site1	5	2	97	2	1	V1494	18	5	18x5	0	1
Site1	5	2	98	2	2	V1	21	6	21x6	0	0
Site1	5	2	99	2	3	V1304	9	22	9x22	0	1
Site1	5	2	103	2	7	V1362	18	5	18x5	0	1
Site1	5	2	104	2	8	V1336	18	5	18x5	0	1
Site1	5	2	105	2	9	V1563	5	14	5x14	0	1
Site1	5	2	106	2	10	V1513	14	5	14x5	0	1
Site1	5	2	107	2	11	V1385	18	5	18x5	0	1
Site1	5	2	110	2	14	V1367	18	5	18x5	0	1
Site1	5	2	111	2	15	V1440	18	5	18x5	0	1
Site1	5	2	113	2	17	V1370	18	5	18x5	0	1
Site1	5	2	114	2	18	V1831	18	5	18x5	0	1
Site1	5	2	115	2	19	V1819	21	22	21x22	0	1
Site1	5	2	118	2	22	V1506	14	5	14x5	0	1
Site1	5	2	120	2	24	V1462	18	5	18x5	0	1
Site1	6	2	122	2	2	V1506	14	5	14x5	0	1
Site1	6	2	126	2	6	V1345	18	5	18x5	0	1
Site1	6	2	127	2	7	V1436	18	5	18x5	0	1
Site1	6	2	129	2	9	V1300	9	22	9x22	0	1
Site1	6	2	131	2	11	V1480	18	5	18x5	0	1
Site1	6	2	135	2	15	V1273	9	22	9x22	0	1
Site1	6	2	138	2	18	V1363	18	5	18x5	0	1
Site1	6	2	139	2	19	V1435	18	5	18x5	0	0
Site1	6	2	141	2	21	V1469	18	5	18x5	0	1
Site1	6	2	143	2	23	V1431	18	5	18x5	0	0
Site1	1	3	1	3	1	V1502	14	5	14x5	0	0
Site1	1	3	2	3	2	V1650	5	14	5x14	0	1
Site1	1	3	5	3	5	V1549	5	14	5x14	0	1
Site1	1	3	6	3	6	V1568	5	14	5x14	0	0
Site1	1	3	7	3	7	V1336	18	5	18x5	0	1
Site1	1	3	8	3	8	V1451	18	5	18x5	0	1
Site1	1	3	10	3	10	V1623	5	14	5x14	0	0
Site1	1	3	11	3	11	V1632	5	14	5x14	0	0
Site1	1	3	13	3	13	V1512	14	5	14x5	0	0
Site1	1	3	14	3	14	V1347	18	5	18x5	0	1
Site1	1	3	15	3	15	V1471	18	5	18x5	0	0
Site1	1	3	16	3	16	V874	18	5	18x5	0	1
Site1	1	3	17	3	17	V1423	18	5	18x5	0	1
Site1	1	3	18	3	18	V1383	18	5	18x5	0	1
Site1	1	3	20	3	20	V1430	18	5	18x5	0	0
Site1	1	3	23	3	23	V1312	9	22	9x22	0	0
Site1	1	3	24	3	24	V1469	18	5	18x5	0	0
Site1	2	3	27	3	3	V1530	5	14	5x14	0	1
Site1	2	3	29	3	5	V1460	18	5	18x5	0	0
Site1	2	3	30	3	6	V1508	14	5	14x5	0	1
Site1	2	3	33	3	9	V1409	18	5	18x5	0	0
Site1	2	3	35	3	11	V1456	18	5	18x5	0	0
Site1	2	3	39	3	15	V1765	14	0	14x.	0	1
Site1	2	3	40	3	16	V1344	18	5	18x5	0	0
Site1	2	3	43	3	19	V1504	14	5	14x5	0	0
Site1	2	3	44	3	20	V1312	9	22	9x22	0	1
Site1	2	3	45	3	21	V1512	14	5	14x5	0	0
Site1	2	3	48	3	24	V1501	14	5	14x5	0	1
Site1	3	3	49	3	1	V1351	18	5	18x5	0	1
Site1	3	3	50	3	2	V1365	18	5	18x5	0	1
Site1	3	3	60	3	12	V1549	5	14	5x14	0	1
Site1	3	3	63	3	15	V1399	18	5	18x5	0	0
Site1	3	3	65	3	17	V1358	18	5	18x5	1	1
Site1	3	3	68	3	20	V890	5	0	5x.	1	0
Site1	3	3	71	3	23	V1807	21	22	21x22	1	1
Site1	4	3	73	3	1	V1517	5	14	5x14	0	1
Site1	4	3	74	3	2	V1421	18	5	18x5	0	0
Site1	4	3	75	3	3	V1663	5	14	5x14	0	1
Site1	4	3	76	3	4	V1819	21	22	21x22	0	1
Site1	4	3	77	3	5	V1652	5	14	5x14	0	1
Site1	4	3	79	3	7	V1471	18	5	18x5	0	0
Site1	4	3	80	3	8	V1828	18	5	18x5	0	1
Site1	4	3	83	3	11	V1410	18	5	18x5	0	1
Site1	4	3	84	3	12	V1646	5	14	5x14	0	1
Site1	4	3	86	3	14	V1416	18	5	18x5	0	1
Site1	4	3	87	3	15	V1467	18	5	18x5	0	1
Site1	4	3	88	3	16	V1815	22	0	22x.	0	0
Site1	4	3	91	3	19	V1287	9	22	9x22	0	0
Site1	4	3	92	3	20	V1377	18	5	18x5	0	1
Site1	4	3	95	3	23	V1387	18	5	18x5	0	1
Site1	5	3	97	3	1	V1379	18	5	18x5	0	0
Site1	5	3	98	3	2	V1541	5	14	5x14	0	1
Site1	5	3	99	3	3	V10	21	5	21x5	0	1
Site1	5	3	100	3	4	V1614	5	14	5x14	0	0
Site1	5	3	101	3	5	V1794	21	22	21x22	0	1
Site1	5	3	102	3	6	V1441	18	5	18x5	0	1
Site1	5	3	103	3	7	V1510	14	5	14x5	0	1
Site1	5	3	104	3	8	V1329	18	5	18x5	0	0
Site1	5	3	105	3	9	V1273	9	22	9x22	0	1
Site1	5	3	109	3	13	V1415	18	5	18x5	0	1
Site1	5	3	110	3	14	V1457	18	5	18x5	0	0
Site1	5	3	111	3	15	V1463	18	5	18x5	0	1
Site1	5	3	112	3	16	V1512	14	5	14x5	0	0
Site1	5	3	113	3	17	V1484	18	5	18x5	0	1
Site1	5	3	115	3	19	V1470	18	5	18x5	0	1
Site1	5	3	117	3	21	V1438	18	5	18x5	0	0
Site1	6	3	121	3	1	V1321	18	5	18x5	0	1
Site1	6	3	122	3	2	V1496	18	5	18x5	0	0
Site1	6	3	123	3	3	V1349	18	5	18x5	0	0
Site1	6	3	124	3	4	V20	22	6	22x6	0	0
Site1	6	3	125	3	5	V885	14	0	14x.	0	1
Site1	6	3	130	3	10	V1421	18	5	18x5	0	0
Site1	6	3	131	3	11	V1542	5	14	5x14	0	1
Site1	6	3	132	3	12	V1279	9	22	9x22	0	1
Site1	6	3	133	3	13	V1838	12	5	12x5	0	1
Site1	6	3	134	3	14	V1364	18	5	18x5	0	1
Site1	6	3	137	3	17	V8	21	5	21x5	0	1
Site1	6	3	139	3	19	V1465	18	5	18x5	0	1
Site1	6	3	141	3	21	V1432	18	5	18x5	0	0
Site1	6	3	142	3	22	V1398	18	5	18x5	0	1
Site1	6	3	143	3	23	V1498	18	5	18x5	0	1
Site1	6	3	144	3	24	V1517	5	14	5x14	0	1
Site1	1	4	2	4	2	V1778	21	22	21x22	0	0
Site1	1	4	4	4	4	V1290	9	22	9x22	0	0
Site1	1	4	6	4	6	V1844	5	17	5x17	1	1
Site1	1	4	11	4	11	V1411	18	5	18x5	1	0
Site1	1	4	19	4	19	V1346	18	5	18x5	0	0
Site1	1	4	20	4	20	V1364	18	5	18x5	0	0
Site1	1	4	21	4	21	V1448	18	5	18x5	0	1
Site1	1	4	22	4	22	V1349	18	5	18x5	0	0
Site1	1	4	24	4	24	V1269	9	22	9x22	0	0
Site1	2	4	25	4	1	V1355	18	5	18x5	0	1
Site1	2	4	29	4	5	V1403	18	5	18x5	0	0
Site1	2	4	31	4	7	V1487	18	5	18x5	0	0
Site1	2	4	34	4	10	V1519	5	14	5x14	0	0
Site1	2	4	36	4	12	V883	18	5	18x5	0	1
Site1	2	4	37	4	13	V1549	5	14	5x14	0	1
Site1	2	4	40	4	16	V1761	21	22	21x22	1	0
Site1	2	4	41	4	17	V1524	5	14	5x14	0	1
Site1	2	4	42	4	18	V1798	22	0	22x.	0	0
Site1	2	4	43	4	19	V1384	18	5	18x5	0	1
Site1	2	4	44	4	20	V1381	18	5	18x5	0	1
Site1	2	4	46	4	22	V1662	5	14	5x14	0	0
Site1	3	4	51	4	3	V1429	18	5	18x5	0	1
Site1	3	4	52	4	4	V1419	18	5	18x5	0	1
Site1	3	4	54	4	6	V1491	18	5	18x5	0	1
Site1	3	4	57	4	9	V1352	18	5	18x5	0	1
Site1	3	4	59	4	11	V1286	9	22	9x22	0	1
Site1	3	4	62	4	14	V16	21	5	21x5	0	1
Site1	3	4	64	4	16	V1632	5	14	5x14	0	0
Site1	3	4	68	4	20	V1340	18	5	18x5	0	1
Site1	3	4	69	4	21	V1329	18	5	18x5	1	0
Site1	3	4	70	4	22	V885	14	0	14x.	0	0
Site1	3	4	71	4	23	V1802	21	22	21x22	0	0
Site1	4	4	74	4	2	V1655	5	14	5x14	0	0
Site1	4	4	75	4	3	V1817	12	5	12x5	0	1
Site1	4	4	78	4	6	V1555	5	14	5x14	0	1
Site1	4	4	79	4	7	V1284	9	22	9x22	0	0
Site1	4	4	80	4	8	V1398	18	5	18x5	0	1
Site1	4	4	81	4	9	V1272	9	22	9x22	0	1
Site1	4	4	83	4	11	V1336	18	5	18x5	0	0
Site1	4	4	84	4	12	V1374	18	5	18x5	0	1
Site1	4	4	85	4	13	V1476	18	5	18x5	0	1
Site1	4	4	87	4	15	V1315	9	22	9x22	0	0
Site1	4	4	88	4	16	V1824	18	5	18x5	1	0
Site1	4	4	90	4	18	V1349	18	5	18x5	0	1
Site1	4	4	91	4	19	V1811	21	5	21x5	0	1
Site1	4	4	93	4	21	V1835	18	5	18x5	0	1
Site1	4	4	94	4	22	V1571	5	14	5x14	0	1
Site1	4	4	95	4	23	V1565	5	14	5x14	1	0
Site1	4	4	96	4	24	V1512	14	5	14x5	0	1
Site1	5	4	99	4	3	V1632	5	14	5x14	0	1
Site1	5	4	100	4	4	V1421	18	5	18x5	0	1
Site1	5	4	104	4	8	V1332	18	5	18x5	0	0
Site1	5	4	105	4	9	V887	5	0	5x.	0	1
Site1	5	4	107	4	11	V1335	18	5	18x5	0	0
Site1	5	4	109	4	13	V1543	5	14	5x14	0	0
Site1	5	4	111	4	15	V1364	18	5	18x5	0	1
Site1	5	4	113	4	17	V1403	18	5	18x5	0	1
Site1	5	4	118	4	22	V1471	18	5	18x5	0	1
Site1	5	4	119	4	23	V1511	14	5	14x5	1	1
Site1	6	4	124	4	4	V1524	5	14	5x14	0	0
Site1	6	4	125	4	5	V1770	5	17	5x17	0	1
Site1	6	4	127	4	7	V1391	18	5	18x5	0	1
Site1	6	4	128	4	8	V1312	9	22	9x22	0	1
Site1	6	4	129	4	9	V1787	21	22	21x22	0	1
Site1	6	4	132	4	12	V1282	9	22	9x22	0	1
Site1	6	4	134	4	14	V1663	5	14	5x14	0	1
Site1	6	4	135	4	15	V1781	21	22	21x22	0	1
Site1	6	4	136	4	16	V1331	18	5	18x5	0	1
Site1	6	4	137	4	17	V1448	18	5	18x5	0	0
Site1	6	4	138	4	18	V1629	5	14	5x14	0	0
Site1	6	4	139	4	19	V1592	5	14	5x14	0	0
Site1	6	4	140	4	20	V1797	21	22	21x22	0	1
Site1	1	5	1	5	1	V1304	9	22	9x22	0	1
Site1	1	5	3	5	3	V1339	18	5	18x5	1	1
Site1	1	5	5	5	5	V1335	18	5	18x5	0	1
Site1	1	5	6	5	6	V1766	5	17	5x17	0	1
Site1	1	5	9	5	9	V1354	18	5	18x5	0	0
Site1	1	5	11	5	11	V1480	18	5	18x5	0	1
Site1	1	5	12	5	12	V877	18	5	18x5	0	1
Site1	1	5	16	5	16	V1509	14	5	14x5	0	0
Site1	1	5	17	5	17	V1507	14	5	14x5	0	0
Site1	1	5	18	5	18	V1827	18	5	18x5	0	0
Site1	1	5	20	5	20	V1659	5	14	5x14	0	0
Site1	1	5	22	5	22	V1321	18	5	18x5	0	1
Site1	2	5	29	5	5	V1807	21	22	21x22	0	1
Site1	2	5	30	5	6	V1483	18	5	18x5	0	0
Site1	2	5	31	5	7	V4	21	6	21x6	0	1
Site1	2	5	32	5	8	V1810	21	5	21x5	0	1
Site1	2	5	36	5	12	V1811	21	5	21x5	0	0
Site1	2	5	37	5	13	V1776	5	12	5x12	0	0
Site1	2	5	38	5	14	V1555	5	14	5x14	0	0
Site1	2	5	40	5	16	V13	21	5	21x5	0	0
Site1	2	5	41	5	17	V1474	18	5	18x5	0	1
Site1	2	5	42	5	18	V1428	18	5	18x5	0	0
Site1	2	5	44	5	20	V1561	5	14	5x14	0	0
Site1	2	5	45	5	21	V1488	18	5	18x5	0	1
Site1	2	5	46	5	22	V1800	21	5	21x5	0	0
Site1	2	5	47	5	23	V1432	18	5	18x5	0	1
Site1	3	5	52	5	4	V1355	18	5	18x5	0	1
Site1	3	5	55	5	7	V1324	18	5	18x5	0	1
Site1	3	5	56	5	8	V1556	5	14	5x14	0	1
Site1	3	5	57	5	9	V1271	9	22	9x22	0	1
Site1	3	5	58	5	10	V1435	18	5	18x5	0	0
Site1	3	5	59	5	11	V1537	5	14	5x14	0	1
Site1	3	5	61	5	13	V1367	18	5	18x5	1	0
Site1	3	5	63	5	15	V1350	18	5	18x5	0	1
Site1	3	5	64	5	16	V17	21	5	21x5	0	0
Site1	3	5	67	5	19	V1470	18	5	18x5	0	1
Site1	3	5	68	5	20	V1560	5	14	5x14	1	0
Site1	3	5	69	5	21	V1417	18	5	18x5	0	0
Site1	3	5	70	5	22	V1374	18	5	18x5	0	0
Site1	3	5	71	5	23	V1439	18	5	18x5	0	0
Site1	4	5	73	5	1	V1426	18	5	18x5	0	1
Site1	4	5	75	5	3	V1473	18	5	18x5	0	0
Site1	4	5	76	5	4	V1522	5	14	5x14	0	1
Site1	4	5	77	5	5	V1321	18	5	18x5	0	1
Site1	4	5	79	5	7	V1524	5	14	5x14	0	0
Site1	4	5	80	5	8	V1448	18	5	18x5	0	1
Site1	4	5	81	5	9	V1455	18	5	18x5	1	1
Site1	4	5	82	5	10	V1362	18	5	18x5	0	1
Site1	4	5	83	5	11	V1781	21	22	21x22	1	0
Site1	4	5	84	5	12	V1485	18	5	18x5	0	1
Site1	4	5	85	5	13	V1487	18	5	18x5	0	0
Site1	4	5	86	5	14	V1454	18	5	18x5	0	1
Site1	4	5	88	5	16	V1518	5	14	5x14	0	1
Site1	4	5	89	5	17	V1822	12	5	12x5	0	1
Site1	4	5	91	5	19	V1327	18	5	18x5	0	1
Site1	4	5	92	5	20	V1436	18	5	18x5	0	1
Site1	4	5	93	5	21	V1845	5	17	5x17	0	0
Site1	4	5	94	5	22	V1464	18	5	18x5	0	1
Site1	4	5	95	5	23	V14	21	5	21x5	0	1
Site1	5	5	97	5	1	V1487	18	5	18x5	0	1
Site1	5	5	98	5	2	V1323	18	5	18x5	0	1
Site1	5	5	99	5	3	V1478	18	5	18x5	0	1
Site1	5	5	104	5	8	V1337	18	5	18x5	0	0
Site1	5	5	105	5	9	V1447	18	5	18x5	0	1
Site1	5	5	107	5	11	V1390	18	5	18x5	0	0
Site1	5	5	108	5	12	V1765	14	0	14x.	1	0
Site1	5	5	109	5	13	V1489	18	5	18x5	0	1
Site1	5	5	110	5	14	V1560	5	14	5x14	0	0
Site1	5	5	112	5	16	V1375	18	5	18x5	0	1
Site1	5	5	115	5	19	V1410	18	5	18x5	0	1
Site1	5	5	118	5	22	V1360	18	5	18x5	0	1
Site1	5	5	120	5	24	V1568	5	14	5x14	0	0
Site1	6	5	126	5	6	V1269	9	22	9x22	0	1
Site1	6	5	127	5	7	V1268	9	22	9x22	0	1
Site1	6	5	128	5	8	V1342	18	5	18x5	0	1
Site1	6	5	130	5	10	V1819	21	22	21x22	1	1
Site1	6	5	133	5	13	V1422	18	5	18x5	0	0
Site1	6	5	134	5	14	V1438	18	5	18x5	0	1
Site1	6	5	135	5	15	V1512	14	5	14x5	1	1
Site1	6	5	137	5	17	V1837	18	5	18x5	1	0
Site1	6	5	139	5	19	V1834	18	5	18x5	0	1
Site1	6	5	141	5	21	V1348	18	5	18x5	0	1
Site1	6	5	143	5	23	V1333	18	5	18x5	0	1
Site1	6	5	144	5	24	V1568	5	14	5x14	0	0
Site1	1	6	2	6	2	V1401	18	5	18x5	0	1
Site1	1	6	4	6	4	V1473	18	5	18x5	0	0
Site1	1	6	6	6	6	V1565	5	14	5x14	0	0
Site1	1	6	7	6	7	V1337	18	5	18x5	0	0
Site1	1	6	11	6	11	V1814	21	22	21x22	0	0
Site1	1	6	13	6	13	V1274	9	22	9x22	0	1
Site1	1	6	14	6	14	V1387	18	5	18x5	0	1
Site1	1	6	15	6	15	V1771	5	17	5x17	0	0
Site1	1	6	16	6	16	V1511	14	5	14x5	0	1
Site1	1	6	17	6	17	V1276	9	22	9x22	0	0
Site1	1	6	21	6	21	V1422	18	5	18x5	0	0
Site1	1	6	22	6	22	V1319	18	5	18x5	0	1
Site1	1	6	24	6	24	V1332	18	5	18x5	0	0
Site1	2	6	25	6	1	V1496	18	5	18x5	0	1
Site1	2	6	29	6	5	V887	5	0	5x.	0	0
Site1	2	6	30	6	6	V1820	21	22	21x22	0	0
Site1	2	6	31	6	7	V1478	18	5	18x5	0	1
Site1	2	6	35	6	11	V1796	21	22	21x22	0	0
Site1	2	6	36	6	12	V1338	18	5	18x5	0	1
Site1	2	6	37	6	13	V888	5	0	5x.	0	0
Site1	2	6	38	6	14	V1809	21	22	21x22	0	1
Site1	2	6	40	6	16	V1321	18	5	18x5	0	1
Site1	2	6	41	6	17	V1277	9	22	9x22	0	1
Site1	2	6	42	6	18	V1845	5	17	5x17	0	0
Site1	2	6	43	6	19	V1480	18	5	18x5	0	1
Site1	2	6	45	6	21	V1272	9	22	9x22	0	1
Site1	2	6	46	6	22	V1805	12	0	12x.	0	1
Site1	2	6	47	6	23	V1834	18	5	18x5	0	1
Site1	3	6	49	6	1	V1339	18	5	18x5	0	1
Site1	3	6	51	6	3	V1780	21	22	21x22	0	0
Site1	3	6	53	6	5	V1770	5	17	5x17	0	0
Site1	3	6	55	6	7	V1495	18	5	18x5	0	1
Site1	3	6	56	6	8	V1497	18	5	18x5	0	1
Site1	3	6	57	6	9	V872	3	11	3x11	0	0
Site1	3	6	59	6	11	V1513	14	5	14x5	0	0
Site1	3	6	60	6	12	V1279	9	22	9x22	0	1
Site1	3	6	61	6	13	V1809	21	22	21x22	0	1
Site1	3	6	63	6	15	V1842	18	5	18x5	0	1
Site1	3	6	64	6	16	V1348	18	5	18x5	0	1
Site1	3	6	67	6	19	V1378	18	5	18x5	1	0
Site1	3	6	68	6	20	V1486	18	5	18x5	0	0
Site1	3	6	71	6	23	V1434	18	5	18x5	0	1
Site1	3	6	72	6	24	V1512	14	5	14x5	0	0
Site1	4	6	73	6	1	V881	18	5	18x5	0	0
Site1	4	6	74	6	2	V1568	5	14	5x14	0	0
Site1	4	6	76	6	4	V1602	5	14	5x14	0	0
Site1	4	6	78	6	6	V1355	18	5	18x5	0	1
Site1	4	6	80	6	8	V1428	18	5	18x5	0	1
Site1	4	6	81	6	9	V1830	18	5	18x5	0	1
Site1	4	6	82	6	10	V1434	18	5	18x5	0	1
Site1	4	6	83	6	11	V1642	5	14	5x14	0	1
Site1	4	6	85	6	13	V1395	18	5	18x5	0	1
Site1	4	6	86	6	14	V1626	5	14	5x14	0	1
Site1	4	6	88	6	16	V1363	18	5	18x5	0	1
Site1	4	6	89	6	17	V1276	9	22	9x22	0	1
Site1	4	6	90	6	18	V1345	18	5	18x5	0	1
Site1	4	6	91	6	19	V1340	18	5	18x5	1	1
Site1	4	6	92	6	20	V1809	21	22	21x22	0	1
Site1	4	6	93	6	21	V6	21	5	21x5	1	1
Site1	4	6	94	6	22	V1504	14	5	14x5	0	1
Site1	4	6	95	6	23	V1382	18	5	18x5	0	1
Site1	4	6	96	6	24	V1299	9	22	9x22	0	1
Site1	5	6	100	6	4	V1479	18	5	18x5	0	1
Site1	5	6	101	6	5	V1556	5	14	5x14	0	1
Site1	5	6	103	6	7	V1580	5	14	5x14	0	0
Site1	5	6	107	6	11	V1365	18	5	18x5	0	0
Site1	5	6	108	6	12	V1446	18	5	18x5	0	1
Site1	5	6	109	6	13	V1378	18	5	18x5	1	0
Site1	5	6	110	6	14	V1281	9	22	9x22	0	0
Site1	5	6	115	6	19	V1546	5	14	5x14	0	1
Site1	5	6	116	6	20	V1394	18	5	18x5	0	1
Site1	5	6	118	6	22	V1442	18	5	18x5	1	0
Site1	5	6	119	6	23	V1303	9	22	9x22	0	0
Site1	6	6	122	6	2	V881	18	5	18x5	0	1
Site1	6	6	123	6	3	V1377	18	5	18x5	0	1
Site1	6	6	125	6	5	V1485	18	5	18x5	0	1
Site1	6	6	126	6	6	V1481	18	5	18x5	0	0
Site1	6	6	127	6	7	V1351	18	5	18x5	0	1
Site1	6	6	128	6	8	V15	21	5	21x5	0	1
Site1	6	6	129	6	9	V1484	18	5	18x5	0	1
Site1	6	6	130	6	10	V1272	9	22	9x22	0	1
Site1	6	6	131	6	11	V1570	5	14	5x14	0	1
Site1	6	6	132	6	12	V1623	5	14	5x14	0	0
Site1	6	6	134	6	14	V1357	18	5	18x5	0	1
Site1	6	6	138	6	18	V1763	5	20	5x20	0	1
Site1	6	6	139	6	19	V1450	18	5	18x5	0	1
Site1	6	6	140	6	20	V1459	18	5	18x5	0	1
Site1	6	6	141	6	21	V1490	18	5	18x5	0	0
Site1	6	6	144	6	24	V1571	5	14	5x14	0	0
Site1	1	7	1	7	1	V1471	18	5	18x5	0	0
Site1	1	7	4	7	4	V1515	5	14	5x14	0	1
Site1	1	7	9	7	9	V1446	18	5	18x5	0	1
Site1	1	7	10	7	10	V1508	14	5	14x5	0	0
Site1	1	7	11	7	11	V1842	18	5	18x5	0	0
Site1	1	7	13	7	13	V1833	18	5	18x5	1	0
Site1	1	7	14	7	14	V1770	5	17	5x17	0	0
Site1	1	7	18	7	18	V1488	18	5	18x5	0	0
Site1	1	7	19	7	19	V1514	5	14	5x14	0	1
Site1	1	7	20	7	20	V1819	21	22	21x22	1	1
Site1	1	7	21	7	21	V1836	18	5	18x5	0	0
Site1	2	7	25	7	1	V1281	9	22	9x22	0	0
Site1	2	7	26	7	2	V1466	18	5	18x5	0	1
Site1	2	7	27	7	3	V1452	18	5	18x5	0	0
Site1	2	7	28	7	4	V1815	22	0	22x.	0	1
Site1	2	7	29	7	5	V1335	18	5	18x5	0	0
Site1	2	7	30	7	6	V873	18	5	18x5	0	0
Site1	2	7	31	7	7	V1319	18	5	18x5	1	0
Site1	2	7	32	7	8	V1836	18	5	18x5	0	0
Site1	2	7	34	7	10	V1371	18	5	18x5	0	1
Site1	2	7	36	7	12	V1388	18	5	18x5	0	1
Site1	2	7	37	7	13	V1770	5	17	5x17	0	0
Site1	2	7	39	7	15	V1492	18	5	18x5	0	0
Site1	2	7	40	7	16	V1278	9	22	9x22	0	0
Site1	2	7	44	7	20	V1385	18	5	18x5	0	0
Site1	2	7	47	7	23	V1802	21	22	21x22	0	0
Site1	3	7	49	7	1	V1330	18	5	18x5	0	0
Site1	3	7	53	7	5	V1506	14	5	14x5	0	1
Site1	3	7	54	7	6	V1304	9	22	9x22	0	0
Site1	3	7	55	7	7	V1830	18	5	18x5	0	0
Site1	3	7	57	7	9	V1275	9	22	9x22	0	1
Site1	3	7	58	7	10	V1328	18	5	18x5	0	0
Site1	3	7	60	7	12	V1353	18	5	18x5	0	1
Site1	3	7	61	7	13	V1332	18	5	18x5	0	1
Site1	3	7	64	7	16	V8	21	5	21x5	1	1
Site1	3	7	65	7	17	V1344	18	5	18x5	0	1
Site1	3	7	67	7	19	V1804	12	0	12x.	0	1
Site1	3	7	69	7	21	V1541	5	14	5x14	1	1
Site1	3	7	70	7	22	V1522	5	14	5x14	0	0
Site1	3	7	71	7	23	V1314	9	22	9x22	0	0
Site1	3	7	72	7	24	V1403	18	5	18x5	0	0
Site1	4	7	73	7	1	V1556	5	14	5x14	0	1
Site1	4	7	74	7	2	V1764	5	17	5x17	0	1
Site1	4	7	75	7	3	V1304	9	22	9x22	0	0
Site1	4	7	76	7	4	V1290	9	22	9x22	0	1
Site1	4	7	79	7	7	V1826	18	5	18x5	0	1
Site1	4	7	80	7	8	V1632	5	14	5x14	0	1
Site1	4	7	82	7	10	V1351	18	5	18x5	0	1
Site1	4	7	83	7	11	V1779	21	22	21x22	0	1
Site1	4	7	84	7	12	V1497	18	5	18x5	0	0
Site1	4	7	85	7	13	V1649	5	14	5x14	0	1
Site1	4	7	89	7	17	V1396	18	5	18x5	0	1
Site1	4	7	90	7	18	V1543	5	14	5x14	0	0
Site1	4	7	92	7	20	V889	5	0	5x.	0	1
Site1	4	7	94	7	22	V1494	18	5	18x5	0	0
Site1	4	7	95	7	23	V1530	5	14	5x14	0	1
Site1	4	7	96	7	24	V1	21	6	21x6	0	0
Site1	5	7	97	7	1	V1549	5	14	5x14	0	0
Site1	5	7	99	7	3	V1642	5	14	5x14	0	1
Site1	5	7	100	7	4	V1468	18	5	18x5	0	1
Site1	5	7	101	7	5	V885	14	0	14x.	0	1
Site1	5	7	104	7	8	V1460	18	5	18x5	0	1
Site1	5	7	106	7	10	V1346	18	5	18x5	0	1
Site1	5	7	109	7	13	V1648	5	14	5x14	0	0
Site1	5	7	110	7	14	V1500	14	5	14x5	0	1
Site1	5	7	114	7	18	V1626	5	14	5x14	0	1
Site1	5	7	116	7	20	V11	21	5	21x5	0	1
Site1	5	7	117	7	21	V1349	18	5	18x5	0	1
Site1	5	7	118	7	22	V1562	5	14	5x14	0	0
Site1	5	7	120	7	24	V1781	21	22	21x22	0	1
Site1	6	7	121	7	1	V1354	18	5	18x5	1	1
Site1	6	7	123	7	3	V1428	18	5	18x5	0	1
Site1	6	7	125	7	5	V1543	5	14	5x14	0	1
Site1	6	7	126	7	6	V1424	18	5	18x5	0	0
Site1	6	7	128	7	8	V1652	5	14	5x14	0	1
Site1	6	7	129	7	9	V1316	9	22	9x22	0	0
Site1	6	7	130	7	10	V1840	22	0	22x.	0	0
Site1	6	7	134	7	14	V1513	14	5	14x5	0	1
Site1	6	7	135	7	15	V1427	18	5	18x5	0	1
Site1	6	7	136	7	16	V1815	22	0	22x.	0	0
Site1	6	7	137	7	17	V1350	18	5	18x5	0	1
Site1	6	7	138	7	18	V1811	21	5	21x5	1	0
Site1	6	7	139	7	19	V1662	5	14	5x14	0	1
Site1	6	7	140	7	20	V1479	18	5	18x5	0	1
Site1	6	7	141	7	21	V1594	5	14	5x14	0	0
Site1	6	7	143	7	23	V1577	5	14	5x14	0	0
Site1	6	7	144	7	24	V1368	18	5	18x5	0	0
Site1	1	8	1	8	1	V1780	21	22	21x22	1	1
Site1	1	8	2	8	2	V1380	18	5	18x5	0	1
Site1	1	8	4	8	4	V1374	18	5	18x5	0	0
Site1	1	8	6	8	6	V1324	18	5	18x5	0	0
Site1	1	8	8	8	8	V1802	21	22	21x22	0	1
Site1	1	8	9	8	9	V1328	18	5	18x5	0	1
Site1	1	8	10	8	10	V1513	14	5	14x5	0	1
Site1	1	8	12	8	12	V1760	5	0	5x.	0	0
Site1	1	8	13	8	13	V1556	5	14	5x14	0	1
Site1	1	8	15	8	15	V1626	5	14	5x14	0	0
Site1	1	8	16	8	16	V1494	18	5	18x5	0	1
Site1	1	8	17	8	17	V1489	18	5	18x5	0	1
Site1	1	8	18	8	18	V1803	12	5	12x5	0	0
Site1	2	8	25	8	1	V1814	21	22	21x22	0	1
Site1	2	8	27	8	3	V1402	18	5	18x5	0	0
Site1	2	8	30	8	6	V1633	5	14	5x14	0	1
Site1	2	8	33	8	9	V1623	5	14	5x14	0	1
Site1	2	8	37	8	13	V1642	5	14	5x14	0	1
Site1	2	8	38	8	14	V881	18	5	18x5	0	0
Site1	2	8	39	8	15	V1431	18	5	18x5	0	0
Site1	2	8	40	8	16	V1827	18	5	18x5	0	0
Site1	2	8	41	8	17	V1406	18	5	18x5	0	0
Site1	2	8	42	8	18	V1327	18	5	18x5	0	0
Site1	2	8	43	8	19	V1423	18	5	18x5	0	0
Site1	2	8	44	8	20	V1484	18	5	18x5	0	1
Site1	2	8	45	8	21	V1429	18	5	18x5	0	0
Site1	2	8	47	8	23	V1649	5	14	5x14	0	0
Site1	3	8	50	8	2	V887	5	0	5x.	0	0
Site1	3	8	52	8	4	V1315	9	22	9x22	0	1
Site1	3	8	53	8	5	V1345	18	5	18x5	0	1
Site1	3	8	54	8	6	V1418	18	5	18x5	0	1
Site1	3	8	55	8	7	V1514	5	14	5x14	0	1
Site1	3	8	56	8	8	V1524	5	14	5x14	1	0
Site1	3	8	59	8	11	V1297	9	22	9x22	0	1
Site1	3	8	60	8	12	V1779	21	22	21x22	0	1
Site1	3	8	63	8	15	V1837	18	5	18x5	0	1
Site1	3	8	64	8	16	V1406	18	5	18x5	0	1
Site1	3	8	65	8	17	V1649	5	14	5x14	0	1
Site1	3	8	66	8	18	V1518	5	14	5x14	0	0
Site1	3	8	67	8	19	V1819	21	22	21x22	0	1
Site1	3	8	68	8	20	V5	21	6	21x6	0	0
Site1	3	8	69	8	21	V1839	18	5	18x5	0	1
Site1	3	8	70	8	22	V1563	5	14	5x14	0	0
Site1	3	8	71	8	23	V1431	18	5	18x5	0	0
Site1	4	8	73	8	1	V1506	14	5	14x5	0	0
Site1	4	8	74	8	2	V1435	18	5	18x5	0	0
Site1	4	8	75	8	3	V1778	21	22	21x22	0	1
Site1	4	8	76	8	4	V1444	18	5	18x5	0	1
Site1	4	8	78	8	6	V1337	18	5	18x5	0	1
Site1	4	8	79	8	7	V1402	18	5	18x5	0	0
Site1	4	8	81	8	9	V1409	18	5	18x5	0	1
Site1	4	8	82	8	10	V1619	5	14	5x14	0	1
Site1	4	8	83	8	11	V1368	18	5	18x5	0	1
Site1	4	8	85	8	13	V1777	12	22	12x22	0	1
Site1	4	8	86	8	14	V1388	18	5	18x5	0	1
Site1	4	8	87	8	15	V884	20	13	20x13	0	1
Site1	4	8	89	8	17	V1766	5	17	5x17	0	1
Site1	4	8	90	8	18	V1549	5	14	5x14	0	0
Site1	4	8	94	8	22	V1483	18	5	18x5	1	1
Site1	5	8	99	8	3	V1502	14	5	14x5	0	1
Site1	5	8	103	8	7	V1402	18	5	18x5	0	1
Site1	5	8	104	8	8	V1570	5	14	5x14	1	1
Site1	5	8	106	8	10	V1524	5	14	5x14	1	0
Site1	5	8	107	8	11	V15	21	5	21x5	0	0
Site1	5	8	108	8	12	V1789	21	22	21x22	0	1
Site1	5	8	111	8	15	V1276	9	22	9x22	0	1
Site1	5	8	113	8	17	V1775	5	20	5x20	0	1
Site1	5	8	115	8	19	V1780	21	22	21x22	0	1
Site1	5	8	116	8	20	V1650	5	14	5x14	0	1
Site1	5	8	117	8	21	V1840	22	0	22x.	0	0
Site1	5	8	118	8	22	V1837	18	5	18x5	0	0
Site1	5	8	119	8	23	V1625	5	14	5x14	0	0
Site1	5	8	120	8	24	V1	21	6	21x6	0	1
Site1	6	8	121	8	1	V1625	5	14	5x14	0	0
Site1	6	8	123	8	3	V1296	9	22	9x22	0	1
Site1	6	8	125	8	5	V1626	5	14	5x14	0	1
Site1	6	8	126	8	6	V1451	18	5	18x5	0	1
Site1	6	8	127	8	7	V1841	22	5	22x5	1	0
Site1	6	8	128	8	8	V1817	12	5	12x5	0	0
Site1	6	8	130	8	10	V1284	9	22	9x22	0	1
Site1	6	8	131	8	11	V1305	9	22	9x22	0	1
Site1	6	8	133	8	13	V1274	9	22	9x22	0	0
Site1	6	8	134	8	14	V1824	18	5	18x5	0	1
Site1	6	8	135	8	15	V1346	18	5	18x5	0	0
Site1	6	8	136	8	16	V1466	18	5	18x5	0	0
Site1	6	8	137	8	17	V1314	9	22	9x22	0	0
Site1	6	8	138	8	18	V1639	5	14	5x14	0	1
Site1	6	8	139	8	19	V1801	12	0	12x.	0	0
Site1	6	8	140	8	20	V1358	18	5	18x5	0	1
Site1	6	8	141	8	21	V1454	18	5	18x5	0	0
Site1	6	8	142	8	22	V1404	18	5	18x5	0	0
Site1	6	8	143	8	23	V1836	18	5	18x5	0	0
Site1	1	9	2	9	2	V1457	18	5	18x5	0	1
Site1	1	9	3	9	3	V1809	21	22	21x22	0	1
Site1	1	9	4	9	4	V1610	5	14	5x14	0	0
Site1	1	9	5	9	5	V1795	21	22	21x22	0	0
Site1	1	9	6	9	6	V1798	22	0	22x.	0	0
Site1	1	9	8	9	8	V1481	18	5	18x5	0	0
Site1	1	9	9	9	9	V1288	9	22	9x22	0	1
Site1	1	9	10	9	10	V1298	9	22	9x22	0	1
Site1	1	9	11	9	11	V1517	5	14	5x14	0	1
Site1	1	9	13	9	13	V1359	18	5	18x5	0	1
Site1	1	9	14	9	14	V1404	18	5	18x5	0	1
Site1	1	9	15	9	15	V1837	18	5	18x5	0	1
Site1	1	9	16	9	16	V1425	18	5	18x5	0	1
Site1	1	9	17	9	17	V1362	18	5	18x5	0	1
Site1	1	9	18	9	18	V1642	5	14	5x14	0	1
Site1	1	9	19	9	19	V1444	18	5	18x5	0	1
Site1	1	9	23	9	23	V1476	18	5	18x5	0	0
Site1	2	9	28	9	4	V1842	18	5	18x5	0	1
Site1	2	9	29	9	5	V1522	5	14	5x14	0	0
Site1	2	9	30	9	6	V1449	18	5	18x5	0	0
Site1	2	9	31	9	7	V1427	18	5	18x5	0	1
Site1	2	9	32	9	8	V1298	9	22	9x22	0	0
Site1	2	9	33	9	9	V1279	9	22	9x22	0	1
Site1	2	9	34	9	10	V1282	9	22	9x22	0	1
Site1	2	9	39	9	15	V1458	18	5	18x5	0	0
Site1	2	9	40	9	16	V1448	18	5	18x5	0	1
Site1	2	9	41	9	17	V1766	5	17	5x17	0	1
Site1	2	9	43	9	19	V1818	21	22	21x22	1	1
Site1	2	9	46	9	22	V1789	21	22	21x22	0	0
Site1	2	9	47	9	23	V1471	18	5	18x5	0	0
Site1	2	9	48	9	24	V1374	18	5	18x5	0	0
Site1	3	9	49	9	1	V1411	18	5	18x5	0	0
Site1	3	9	50	9	2	V1594	5	14	5x14	0	0
Site1	3	9	52	9	4	V1424	18	5	18x5	0	0
Site1	3	9	53	9	5	V1498	18	5	18x5	0	0
Site1	3	9	54	9	6	V1496	18	5	18x5	0	1
Site1	3	9	55	9	7	V1387	18	5	18x5	0	1
Site1	3	9	57	9	9	V1386	18	5	18x5	0	1
Site1	3	9	58	9	10	V1462	18	5	18x5	0	0
Site1	3	9	59	9	11	V1565	5	14	5x14	0	1
Site1	3	9	60	9	12	V1445	18	5	18x5	0	0
Site1	3	9	61	9	13	V1376	18	5	18x5	0	0
Site1	3	9	62	9	14	V1763	5	20	5x20	0	0
Site1	3	9	63	9	15	V1398	18	5	18x5	0	0
Site1	3	9	64	9	16	V1391	18	5	18x5	0	1
Site1	3	9	65	9	17	V1568	5	14	5x14	0	0
Site1	3	9	66	9	18	V1507	14	5	14x5	0	0
Site1	3	9	67	9	19	V1401	18	5	18x5	0	0
Site1	3	9	68	9	20	V1331	18	5	18x5	0	0
Site1	3	9	69	9	21	V1577	5	14	5x14	0	1
Site1	3	9	70	9	22	V1603	5	14	5x14	0	0
Site1	3	9	72	9	24	V1385	18	5	18x5	0	0
Site1	4	9	74	9	2	V1415	18	5	18x5	0	1
Site1	4	9	75	9	3	V1367	18	5	18x5	0	1
Site1	4	9	77	9	5	V1423	18	5	18x5	0	1
Site1	4	9	80	9	8	V1492	18	5	18x5	0	0
Site1	4	9	81	9	9	V1537	5	14	5x14	0	1
Site1	4	9	82	9	10	V1288	9	22	9x22	0	1
Site1	4	9	83	9	11	V1466	18	5	18x5	0	1
Site1	4	9	86	9	14	V1329	18	5	18x5	0	1
Site1	4	9	87	9	15	V1797	21	22	21x22	0	1
Site1	4	9	88	9	16	V1789	21	22	21x22	0	1
Site1	4	9	91	9	19	V13	21	5	21x5	0	1
Site1	4	9	93	9	21	V1491	18	5	18x5	1	1
Site1	4	9	94	9	22	V1403	18	5	18x5	0	1
Site1	5	9	97	9	1	V1561	5	14	5x14	0	1
Site1	5	9	98	9	2	V1466	18	5	18x5	0	0
Site1	5	9	99	9	3	V1297	9	22	9x22	0	1
Site1	5	9	101	9	5	V1355	18	5	18x5	0	1
Site1	5	9	103	9	7	V1283	9	22	9x22	0	1
Site1	5	9	105	9	9	V1519	5	14	5x14	0	0
Site1	5	9	107	9	11	V1504	14	5	14x5	0	1
Site1	5	9	108	9	12	V1841	22	5	22x5	0	1
Site1	5	9	110	9	14	V1383	18	5	18x5	0	1
Site1	5	9	111	9	15	V1824	18	5	18x5	0	1
Site1	5	9	112	9	16	V883	18	5	18x5	0	1
Site1	5	9	114	9	18	V1419	18	5	18x5	0	0
Site1	5	9	116	9	20	V1505	14	5	14x5	0	1
Site1	5	9	117	9	21	V889	5	0	5x.	0	0
Site1	5	9	118	9	22	V1796	21	22	21x22	1	1
Site1	5	9	120	9	24	V877	18	5	18x5	0	1
Site1	6	9	125	9	5	V1371	18	5	18x5	0	1
Site1	6	9	126	9	6	V1458	18	5	18x5	0	1
Site1	6	9	128	9	8	V1541	5	14	5x14	0	1
Site1	6	9	129	9	9	V1475	18	5	18x5	0	0
Site1	6	9	130	9	10	V1802	21	22	21x22	0	1
Site1	6	9	131	9	11	V1336	18	5	18x5	0	0
Site1	6	9	132	9	12	V1580	5	14	5x14	0	1
Site1	6	9	133	9	13	V1352	18	5	18x5	0	1
Site1	6	9	134	9	14	V1562	5	14	5x14	0	0
Site1	6	9	136	9	16	V1807	21	22	21x22	1	1
Site1	6	9	137	9	17	V1320	18	5	18x5	0	1
Site1	6	9	138	9	18	V1659	5	14	5x14	0	0
Site1	6	9	139	9	19	V1374	18	5	18x5	0	0
Site1	6	9	141	9	21	V1365	18	5	18x5	0	1
Site1	1	10	5	10	5	V1303	9	22	9x22	0	1
Site1	1	10	8	10	8	V1268	9	22	9x22	0	0
Site1	1	10	10	10	10	V1403	18	5	18x5	0	1
Site1	1	10	11	10	11	V1461	18	5	18x5	0	0
Site1	1	10	14	10	14	V1466	18	5	18x5	0	0
Site1	1	10	15	10	15	V1391	18	5	18x5	0	1
Site1	1	10	17	10	17	V1355	18	5	18x5	0	1
Site1	1	10	18	10	18	V1388	18	5	18x5	0	0
Site1	1	10	19	10	19	V1474	18	5	18x5	0	1
Site1	1	10	20	10	20	V1835	18	5	18x5	1	1
Site1	1	10	23	10	23	V1592	5	14	5x14	0	0
Site1	2	10	26	10	2	V1421	18	5	18x5	0	1
Site1	2	10	30	10	6	V1347	18	5	18x5	0	1
Site1	2	10	32	10	8	V1646	5	14	5x14	0	0
Site1	2	10	33	10	9	V1491	18	5	18x5	0	0
Site1	2	10	35	10	11	V1268	9	22	9x22	0	1
Site1	2	10	36	10	12	V1565	5	14	5x14	0	0
Site1	2	10	37	10	13	V1300	9	22	9x22	0	1
Site1	2	10	38	10	14	V1396	18	5	18x5	1	0
Site1	2	10	39	10	15	V1780	21	22	21x22	0	1
Site1	2	10	40	10	16	V1276	9	22	9x22	0	1
Site1	2	10	43	10	19	V1626	5	14	5x14	0	1
Site1	2	10	48	10	24	V1443	18	5	18x5	0	0
Site1	3	10	49	10	1	V1473	18	5	18x5	0	0
Site1	3	10	51	10	3	V1815	22	0	22x.	0	0
Site1	3	10	52	10	4	V1479	18	5	18x5	0	0
Site1	3	10	54	10	6	V14	21	5	21x5	0	0
Site1	3	10	55	10	7	V1800	21	5	21x5	0	0
Site1	3	10	56	10	8	V1456	18	5	18x5	1	1
Site1	3	10	57	10	9	V15	21	5	21x5	0	0
Site1	3	10	58	10	10	V1806	12	5	12x5	0	1
Site1	3	10	59	10	11	V1814	21	22	21x22	0	1
Site1	3	10	60	10	12	V1478	18	5	18x5	0	1
Site1	3	10	61	10	13	V1494	18	5	18x5	0	1
Site1	3	10	62	10	14	V1317	9	22	9x22	1	1
Site1	3	10	63	10	15	V1394	18	5	18x5	0	0
Site1	3	10	64	10	16	V1466	18	5	18x5	0	0
Site1	3	10	68	10	20	V1468	18	5	18x5	0	0
Site1	3	10	70	10	22	V1327	18	5	18x5	0	1
Site1	3	10	71	10	23	V1504	14	5	14x5	0	0
Site1	3	10	72	10	24	V1475	18	5	18x5	0	0
Site1	4	10	74	10	2	V1381	18	5	18x5	0	1
Site1	4	10	76	10	4	V1404	18	5	18x5	0	1
Site1	4	10	77	10	5	V1795	21	22	21x22	0	1
Site1	4	10	78	10	6	V1318	18	5	18x5	0	0
Site1	4	10	79	10	7	V1480	18	5	18x5	0	1
Site1	4	10	82	10	10	V1514	5	14	5x14	0	1
Site1	4	10	87	10	15	V1802	21	22	21x22	0	1
Site1	4	10	91	10	19	V1385	18	5	18x5	0	1
Site1	4	10	93	10	21	V5	21	6	21x6	0	1
Site1	4	10	96	10	24	V887	5	0	5x.	0	0
Site1	5	10	97	10	1	V1315	9	22	9x22	0	0
Site1	5	10	98	10	2	V1490	18	5	18x5	0	1
Site1	5	10	101	10	5	V1436	18	5	18x5	0	1
Site1	5	10	102	10	6	V1282	9	22	9x22	0	1
Site1	5	10	103	10	7	V1653	5	14	5x14	0	1
Site1	5	10	104	10	8	V1298	9	22	9x22	0	0
Site1	5	10	105	10	9	V8	21	5	21x5	0	1
Site1	5	10	107	10	11	V1352	18	5	18x5	0	0
Site1	5	10	112	10	16	V1277	9	22	9x22	0	0
Site1	5	10	115	10	19	V1411	18	5	18x5	0	0
Site1	5	10	116	10	20	V1320	18	5	18x5	0	0
Site1	5	10	117	10	21	V1448	18	5	18x5	0	1
Site1	5	10	118	10	22	V1509	14	5	14x5	0	1
Site1	5	10	119	10	23	V1450	18	5	18x5	0	0
Site1	5	10	120	10	24	V1333	18	5	18x5	0	0
Site1	6	10	121	10	1	V1369	18	5	18x5	0	1
Site1	6	10	123	10	3	V1760	5	0	5x.	0	1
Site1	6	10	124	10	4	V1632	5	14	5x14	0	1
Site1	6	10	126	10	6	V1555	5	14	5x14	0	0
Site1	6	10	128	10	8	V1779	21	22	21x22	0	1
Site1	6	10	129	10	9	V1473	18	5	18x5	0	0
Site1	6	10	130	10	10	V1494	18	5	18x5	0	1
Site1	6	10	131	10	11	V1492	18	5	18x5	0	1
Site1	6	10	132	10	12	V1778	21	22	21x22	0	1
Site1	6	10	133	10	13	V883	18	5	18x5	0	1
Site1	6	10	134	10	14	V1470	18	5	18x5	0	1
Site1	6	10	135	10	15	V1381	18	5	18x5	0	1
Site1	6	10	136	10	16	V1271	9	22	9x22	0	0
Site1	6	10	137	10	17	V1347	18	5	18x5	0	1
Site1	6	10	140	10	20	V1324	18	5	18x5	0	1
Site1	1	11	9	11	9	V1395	18	5	18x5	0	1
Site1	1	11	14	11	14	V1370	18	5	18x5	0	1
Site1	1	11	15	11	15	V1279	9	22	9x22	0	1
Site1	1	11	19	11	19	V1834	18	5	18x5	0	0
Site1	1	11	21	11	21	V1768	5	17	5x17	0	1
Site1	2	11	25	11	1	V1518	5	14	5x14	0	0
Site1	2	11	26	11	2	V1568	5	14	5x14	0	0
Site1	2	11	27	11	3	V1556	5	14	5x14	0	1
Site1	2	11	29	11	5	V1570	5	14	5x14	0	1
Site1	2	11	30	11	6	V1489	18	5	18x5	0	1
Site1	2	11	31	11	7	V1349	18	5	18x5	0	1
Site1	2	11	32	11	8	V1498	18	5	18x5	0	1
Site1	2	11	33	11	9	V17	21	5	21x5	0	1
Site1	2	11	34	11	10	V1837	18	5	18x5	0	0
Site1	2	11	36	11	12	V20	22	6	22x6	0	0
Site1	2	11	37	11	13	V1380	18	5	18x5	0	0
Site1	2	11	38	11	14	V1653	5	14	5x14	0	1
Site1	2	11	40	11	16	V1462	18	5	18x5	0	1
Site1	2	11	41	11	17	V6	21	5	21x5	0	0
Site1	2	11	42	11	18	V1819	21	22	21x22	0	1
Site1	2	11	43	11	19	V1515	5	14	5x14	0	1
Site1	2	11	45	11	21	V1767	14	0	14x.	1	1
Site1	2	11	48	11	24	V1412	18	5	18x5	0	0
Site1	3	11	49	11	1	V1585	5	14	5x14	0	0
Site1	3	11	51	11	3	V1290	9	22	9x22	0	1
Site1	3	11	52	11	4	V4	21	6	21x6	0	0
Site1	3	11	53	11	5	V1652	5	14	5x14	0	0
Site1	3	11	57	11	9	V1321	18	5	18x5	0	1
Site1	3	11	61	11	13	V1444	18	5	18x5	0	1
Site1	3	11	62	11	14	V1469	18	5	18x5	0	1
Site1	3	11	64	11	16	V1785	21	5	21x5	0	0
Site1	3	11	65	11	17	V1436	18	5	18x5	0	1
Site1	3	11	67	11	19	V1373	18	5	18x5	0	1
Site1	3	11	68	11	20	V1530	5	14	5x14	1	0
Site1	3	11	69	11	21	V1299	9	22	9x22	0	0
Site1	3	11	70	11	22	V882	18	5	18x5	0	1
Site1	3	11	72	11	24	V1409	18	5	18x5	0	0
Site1	4	11	73	11	1	V1316	9	22	9x22	0	1
Site1	4	11	74	11	2	V1548	5	14	5x14	0	1
Site1	4	11	75	11	3	V1770	5	17	5x17	0	1
Site1	4	11	76	11	4	V1594	5	14	5x14	0	1
Site1	4	11	77	11	5	V1451	18	5	18x5	0	1
Site1	4	11	79	11	7	V1364	18	5	18x5	0	1
Site1	4	11	80	11	8	V1399	18	5	18x5	0	1
Site1	4	11	83	11	11	V1484	18	5	18x5	0	1
Site1	4	11	84	11	12	V1370	18	5	18x5	0	1
Site1	4	11	87	11	15	V1580	5	14	5x14	0	1
Site1	4	11	88	11	16	V1456	18	5	18x5	0	0
Site1	4	11	89	11	17	V1359	18	5	18x5	0	1
Site1	4	11	90	11	18	V1644	5	14	5x14	1	1
Site1	4	11	92	11	20	V1474	18	5	18x5	0	1
Site1	4	11	94	11	22	V1352	18	5	18x5	0	1
Site1	4	11	95	11	23	V1452	18	5	18x5	0	0
Site1	5	11	97	11	1	V1459	18	5	18x5	0	1
Site1	5	11	100	11	4	V1423	18	5	18x5	0	1
Site1	5	11	101	11	5	V1472	18	5	18x5	0	1
Site1	5	11	102	11	6	V1766	5	17	5x17	0	0
Site1	5	11	104	11	8	V1537	5	14	5x14	0	0
Site1	5	11	105	11	9	V1388	18	5	18x5	0	1
Site1	5	11	107	11	11	V1314	9	22	9x22	0	0
Site1	5	11	108	11	12	V1328	18	5	18x5	0	1
Site1	5	11	110	11	14	V1768	5	17	5x17	0	1
Site1	5	11	111	11	15	V888	5	0	5x.	0	1
Site1	5	11	113	11	17	V1454	18	5	18x5	0	0
Site1	5	11	116	11	20	V1426	18	5	18x5	1	1
Site1	5	11	117	11	21	V1652	5	14	5x14	0	1
Site1	5	11	119	11	23	V1761	21	22	21x22	0	0
Site1	6	11	121	11	1	V1646	5	14	5x14	0	1
Site1	6	11	123	11	3	V1376	18	5	18x5	0	0
Site1	6	11	126	11	6	V1344	18	5	18x5	0	0
Site1	6	11	128	11	8	V1530	5	14	5x14	0	0
Site1	6	11	129	11	9	V1366	18	5	18x5	0	0
Site1	6	11	132	11	12	V1446	18	5	18x5	0	1
Site1	6	11	133	11	13	V1463	18	5	18x5	0	1
Site1	6	11	134	11	14	V1456	18	5	18x5	0	0
Site1	6	11	135	11	15	V1474	18	5	18x5	0	0
Site1	6	11	136	11	16	V1405	18	5	18x5	0	0
Site1	6	11	137	11	17	V1504	14	5	14x5	0	1
Site1	6	11	139	11	19	V1499	14	5	14x5	0	0
Site1	6	11	141	11	21	V1650	5	14	5x14	0	0
Site1	6	11	142	11	22	V1649	5	14	5x14	0	1
Site1	6	11	143	11	23	V1278	9	22	9x22	0	1
Site1	1	12	8	12	8	V1367	18	5	18x5	0	1
Site1	1	12	9	12	9	V1360	18	5	18x5	0	0
Site1	1	12	11	12	11	V1272	9	22	9x22	0	1
Site1	1	12	17	12	17	V1554	5	14	5x14	0	1
Site1	1	12	18	12	18	V1409	18	5	18x5	0	1
Site1	1	12	19	12	19	V885	14	0	14x.	0	0
Site1	2	12	25	12	1	V1839	18	5	18x5	1	0
Site1	2	12	29	12	5	V1303	9	22	9x22	0	0
Site1	2	12	32	12	8	V1629	5	14	5x14	0	0
Site1	2	12	35	12	11	V1330	18	5	18x5	0	1
Site1	2	12	37	12	13	V1476	18	5	18x5	0	0
Site1	2	12	39	12	15	V1537	5	14	5x14	0	0
Site1	2	12	40	12	16	V1775	5	20	5x20	0	1
Site1	2	12	41	12	17	V1824	18	5	18x5	0	1
Site1	2	12	43	12	19	V1500	14	5	14x5	0	0
Site1	2	12	45	12	21	V1353	18	5	18x5	0	0
Site1	3	12	49	12	1	V1452	18	5	18x5	0	0
Site1	3	12	50	12	2	V1653	5	14	5x14	0	1
Site1	3	12	51	12	3	V1761	21	22	21x22	0	0
Site1	3	12	52	12	4	V1465	18	5	18x5	0	0
Site1	3	12	53	12	5	V1383	18	5	18x5	0	0
Site1	3	12	55	12	7	V1633	5	14	5x14	0	1
Site1	3	12	56	12	8	V1390	18	5	18x5	0	0
Site1	3	12	57	12	9	V9	21	5	21x5	1	0
Site1	3	12	58	12	10	V1828	18	5	18x5	0	0
Site1	3	12	59	12	11	V1269	9	22	9x22	0	0
Site1	3	12	62	12	14	V1824	18	5	18x5	0	0
Site1	3	12	63	12	15	V1803	12	5	12x5	0	0
Site1	3	12	65	12	17	V1484	18	5	18x5	0	1
Site1	3	12	66	12	18	V1450	18	5	18x5	0	1
Site1	3	12	67	12	19	V1303	9	22	9x22	0	1
Site1	3	12	70	12	22	V1487	18	5	18x5	0	1
Site1	3	12	71	12	23	V1561	5	14	5x14	0	0
Site1	3	12	72	12	24	V1826	18	5	18x5	0	1
Site1	4	12	73	12	1	V1422	18	5	18x5	0	1
Site1	4	12	74	12	2	V1501	14	5	14x5	0	1
Site1	4	12	75	12	3	V1561	5	14	5x14	0	1
Site1	4	12	76	12	4	V1271	9	22	9x22	0	1
Site1	4	12	77	12	5	V1837	18	5	18x5	0	0
Site1	4	12	79	12	7	V1347	18	5	18x5	0	1
Site1	4	12	80	12	8	V1562	5	14	5x14	0	0
Site1	4	12	82	12	10	V1376	18	5	18x5	0	0
Site1	4	12	83	12	11	V1472	18	5	18x5	0	0
Site1	4	12	85	12	13	V1411	18	5	18x5	0	0
Site1	4	12	87	12	15	V1840	22	0	22x.	0	0
Site1	4	12	89	12	17	V1477	18	5	18x5	1	0
Site1	4	12	90	12	18	V888	5	0	5x.	1	0
Site1	4	12	91	12	19	V1354	18	5	18x5	0	1
Site1	4	12	94	12	22	V1807	21	22	21x22	0	1
Site1	4	12	96	12	24	V1820	21	22	21x22	0	1
Site1	5	12	97	12	1	V1499	14	5	14x5	0	1
Site1	5	12	99	12	3	V1836	18	5	18x5	0	1
Site1	5	12	100	12	4	V17	21	5	21x5	0	1
Site1	5	12	102	12	6	V1429	18	5	18x5	0	1
Site1	5	12	103	12	7	V1571	5	14	5x14	0	1
Site1	5	12	104	12	8	V1387	18	5	18x5	0	0
Site1	5	12	106	12	10	V1663	5	14	5x14	0	0
Site1	5	12	107	12	11	V1431	18	5	18x5	0	1
Site1	5	12	109	12	13	V1325	18	5	18x5	0	0
Site1	5	12	112	12	16	V1324	18	5	18x5	0	1
Site1	5	12	115	12	19	V1353	18	5	18x5	1	1
Site1	5	12	116	12	20	V1268	9	22	9x22	0	1
Site1	5	12	117	12	21	V1279	9	22	9x22	0	1
Site1	5	12	118	12	22	V1820	21	22	21x22	0	0
Site1	5	12	120	12	24	V1662	5	14	5x14	1	0
Site1	6	12	121	12	1	V1527	5	14	5x14	0	1
Site1	6	12	122	12	2	V1510	14	5	14x5	0	0
Site1	6	12	124	12	4	V1	21	6	21x6	0	0
Site1	6	12	125	12	5	V873	18	5	18x5	0	1
Site1	6	12	129	12	9	V1514	5	14	5x14	1	1
Site1	6	12	132	12	12	V1409	18	5	18x5	0	1
Site1	6	12	134	12	14	V1401	18	5	18x5	0	0
Site1	6	12	135	12	15	V1830	18	5	18x5	0	1
Site1	6	12	136	12	16	V1332	18	5	18x5	0	1
Site1	6	12	137	12	17	V1642	5	14	5x14	0	1
Site1	1	13	1	13	1	V1	21	6	21x6	0	0
Site1	1	13	3	13	3	V1329	18	5	18x5	0	0
Site1	1	13	4	13	4	V1412	18	5	18x5	0	0
Site1	1	13	5	13	5	V1410	18	5	18x5	0	1
Site1	1	13	7	13	7	V887	5	0	5x.	0	1
Site1	1	13	9	13	9	V1824	18	5	18x5	0	1
Site1	1	13	10	13	10	V1460	18	5	18x5	0	0
Site1	1	13	12	13	12	V1398	18	5	18x5	0	0
Site1	1	13	14	13	14	V1548	5	14	5x14	0	1
Site1	1	13	16	13	16	V1313	9	22	9x22	0	1
Site1	1	13	17	13	17	V1428	18	5	18x5	0	1
Site1	1	13	20	13	20	V1831	18	5	18x5	0	1
Site1	1	13	21	13	21	V1501	14	5	14x5	0	0
Site1	2	13	25	13	1	V1655	5	14	5x14	0	0
Site1	2	13	26	13	2	V1479	18	5	18x5	0	1
Site1	2	13	27	13	3	V1650	5	14	5x14	0	1
Site1	2	13	28	13	4	V1283	9	22	9x22	1	0
Site1	2	13	31	13	7	V1323	18	5	18x5	0	1
Site1	2	13	32	13	8	V1611	5	14	5x14	0	1
Site1	2	13	34	13	10	V1469	18	5	18x5	0	1
Site1	2	13	40	13	16	V1828	18	5	18x5	1	1
Site1	2	13	41	13	17	V874	18	5	18x5	0	0
Site1	2	13	44	13	20	V1502	14	5	14x5	0	1
Site1	2	13	47	13	23	V1795	21	22	21x22	0	1
Site1	2	13	48	13	24	V1290	9	22	9x22	0	1
Site1	3	13	52	13	4	V1663	5	14	5x14	0	1
Site1	3	13	53	13	5	V1625	5	14	5x14	0	0
Site1	3	13	55	13	7	V1440	18	5	18x5	0	0
Site1	3	13	58	13	10	V1318	18	5	18x5	0	0
Site1	3	13	59	13	11	V888	5	0	5x.	0	1
Site1	3	13	60	13	12	V1368	18	5	18x5	0	0
Site1	3	13	61	13	13	V1831	18	5	18x5	0	1
Site1	3	13	62	13	14	V1364	18	5	18x5	0	0
Site1	3	13	65	13	17	V1771	5	17	5x17	0	1
Site1	3	13	66	13	18	V1642	5	14	5x14	0	1
Site1	3	13	67	13	19	V1423	18	5	18x5	0	1
Site1	3	13	69	13	21	V1622	5	14	5x14	0	0
Site1	3	13	70	13	22	V1427	18	5	18x5	0	0
Site1	3	13	71	13	23	V1562	5	14	5x14	0	1
Site1	3	13	72	13	24	V1433	18	5	18x5	0	1
Site1	4	13	74	13	2	V1622	5	14	5x14	0	1
Site1	4	13	75	13	3	V8	21	5	21x5	1	0
Site1	4	13	78	13	6	V1519	5	14	5x14	0	1
Site1	4	13	79	13	7	V1320	18	5	18x5	0	1
Site1	4	13	81	13	9	V1469	18	5	18x5	0	1
Site1	4	13	82	13	10	V1488	18	5	18x5	0	0
Site1	4	13	83	13	11	V879	18	5	18x5	0	0
Site1	4	13	85	13	13	V1268	9	22	9x22	0	0
Site1	4	13	86	13	14	V1502	14	5	14x5	0	1
Site1	4	13	87	13	15	V1333	18	5	18x5	0	0
Site1	4	13	89	13	17	V1308	9	22	9x22	0	0
Site1	4	13	90	13	18	V1814	21	22	21x22	0	1
Site1	4	13	91	13	19	V1406	18	5	18x5	0	0
Site1	4	13	92	13	20	V1495	18	5	18x5	1	1
Site1	4	13	93	13	21	V1554	5	14	5x14	0	1
Site1	4	13	94	13	22	V1500	14	5	14x5	0	0
Site1	4	13	95	13	23	V1389	18	5	18x5	0	1
Site1	5	13	101	13	5	V1770	5	17	5x17	0	1
Site1	5	13	102	13	6	V4	21	6	21x6	0	1
Site1	5	13	105	13	9	V1480	18	5	18x5	0	1
Site1	5	13	107	13	11	V1381	18	5	18x5	0	1
Site1	5	13	108	13	12	V1434	18	5	18x5	0	1
Site1	5	13	112	13	16	V1305	9	22	9x22	0	1
Site1	5	13	113	13	17	V1405	18	5	18x5	0	0
Site1	5	13	116	13	20	V1782	21	6	21x6	0	0
Site1	5	13	117	13	21	V1569	5	14	5x14	1	0
Site1	5	13	118	13	22	V1319	18	5	18x5	0	0
Site1	5	13	119	13	23	V1368	18	5	18x5	0	1
Site1	6	13	122	13	2	V1549	5	14	5x14	0	1
Site1	6	13	123	13	3	V1319	18	5	18x5	1	0
Site1	6	13	126	13	6	V1759	5	12	5x12	0	1
Site1	6	13	129	13	9	V1297	9	22	9x22	0	1
Site1	6	13	130	13	10	V1393	18	5	18x5	1	0
Site1	6	13	131	13	11	V1412	18	5	18x5	0	1
Site1	6	13	133	13	13	V1286	9	22	9x22	0	0
Site1	6	13	134	13	14	V1400	18	5	18x5	0	1
Site1	6	13	136	13	16	V1804	12	0	12x.	0	0
Site1	6	13	138	13	18	V1653	5	14	5x14	0	0
Site1	6	13	139	13	19	V1280	9	22	9x22	0	1
Site1	6	13	140	13	20	V3	21	6	21x6	0	0
Site1	1	14	1	14	1	V1530	5	14	5x14	0	0
Site1	1	14	2	14	2	V1518	5	14	5x14	0	0
Site1	1	14	3	14	3	V1402	18	5	18x5	0	0
Site1	1	14	9	14	9	V1562	5	14	5x14	0	0
Site1	1	14	10	14	10	V1522	5	14	5x14	0	1
Site1	1	14	13	14	13	V1353	18	5	18x5	0	1
Site1	1	14	16	14	16	V1368	18	5	18x5	0	1
Site1	1	14	18	14	18	V1318	18	5	18x5	0	1
Site1	1	14	19	14	19	V1652	5	14	5x14	0	1
Site1	1	14	21	14	21	V1286	9	22	9x22	0	1
Site1	1	14	23	14	23	V1340	18	5	18x5	0	0
Site1	2	14	25	14	1	V1652	5	14	5x14	0	0
Site1	2	14	26	14	2	V1405	18	5	18x5	0	1
Site1	2	14	31	14	7	V1610	5	14	5x14	0	1
Site1	2	14	33	14	9	V1	21	6	21x6	0	1
Site1	2	14	34	14	10	V1390	18	5	18x5	0	0
Site1	2	14	35	14	11	V1378	18	5	18x5	1	0
Site1	2	14	36	14	12	V1316	9	22	9x22	0	1
Site1	2	14	37	14	13	V1346	18	5	18x5	0	1
Site1	2	14	38	14	14	V1569	5	14	5x14	0	0
Site1	2	14	39	14	15	V1603	5	14	5x14	0	1
Site1	2	14	40	14	16	V1386	18	5	18x5	0	1
Site1	2	14	41	14	17	V1465	18	5	18x5	0	1
Site1	2	14	42	14	18	V1369	18	5	18x5	0	0
Site1	2	14	43	14	19	V1486	18	5	18x5	0	1
Site1	2	14	44	14	20	V1325	18	5	18x5	0	1
Site1	2	14	45	14	21	V1368	18	5	18x5	0	1
Site1	2	14	46	14	22	V885	14	0	14x.	0	0
Site1	3	14	50	14	2	V1422	18	5	18x5	0	0
Site1	3	14	60	14	12	V1451	18	5	18x5	0	0
Site1	3	14	61	14	13	V873	18	5	18x5	0	1
Site1	3	14	63	14	15	V1811	21	5	21x5	0	1
Site1	3	14	65	14	17	V1404	18	5	18x5	0	0
Site1	3	14	69	14	21	V1626	5	14	5x14	0	1
Site1	3	14	70	14	22	V1508	14	5	14x5	0	0
Site1	3	14	71	14	23	V1623	5	14	5x14	0	0
Site1	3	14	72	14	24	V1492	18	5	18x5	0	0
Site1	4	14	74	14	2	V1844	5	17	5x17	0	1
Site1	4	14	75	14	3	V1831	18	5	18x5	0	0
Site1	4	14	77	14	5	V1432	18	5	18x5	0	1
Site1	4	14	78	14	6	V1286	9	22	9x22	0	1
Site1	4	14	79	14	7	V1508	14	5	14x5	0	0
Site1	4	14	81	14	9	V1653	5	14	5x14	0	0
Site1	4	14	82	14	10	V1801	12	0	12x.	0	0
Site1	4	14	83	14	11	V1509	14	5	14x5	0	1
Site1	4	14	84	14	12	V1541	5	14	5x14	0	0
Site1	4	14	86	14	14	V1319	18	5	18x5	0	1
Site1	4	14	87	14	15	V1330	18	5	18x5	0	1
Site1	4	14	89	14	17	V1441	18	5	18x5	0	1
Site1	4	14	90	14	18	V9	21	5	21x5	0	1
Site1	4	14	92	14	20	V1542	5	14	5x14	0	0
Site1	4	14	93	14	21	V1348	18	5	18x5	0	1
Site1	4	14	96	14	24	V1623	5	14	5x14	0	1
Site1	5	14	98	14	2	V1424	18	5	18x5	0	1
Site1	5	14	99	14	3	V1762	5	12	5x12	0	1
Site1	5	14	100	14	4	V1809	21	22	21x22	0	1
Site1	5	14	101	14	5	V1439	18	5	18x5	0	0
Site1	5	14	105	14	9	V1344	18	5	18x5	0	1
Site1	5	14	108	14	12	V1455	18	5	18x5	0	0
Site1	5	14	112	14	16	V1817	12	5	12x5	0	0
Site1	5	14	114	14	18	V1420	18	5	18x5	1	1
Site1	5	14	117	14	21	V1822	12	5	12x5	0	0
Site1	5	14	118	14	22	V1396	18	5	18x5	0	1
Site1	5	14	119	14	23	V1814	21	22	21x22	0	1
Site1	5	14	120	14	24	V1514	5	14	5x14	0	1
Site1	6	14	121	14	1	V1362	18	5	18x5	0	1
Site1	6	14	122	14	2	V1482	18	5	18x5	0	1
Site1	6	14	123	14	3	V1467	18	5	18x5	0	1
Site1	6	14	124	14	4	V1460	18	5	18x5	0	0
Site1	6	14	126	14	6	V1415	18	5	18x5	0	1
Site1	6	14	128	14	8	V1814	21	22	21x22	1	1
Site1	6	14	130	14	10	V884	20	13	20x13	0	1
Site1	6	14	131	14	11	V19	12	6	12x6	0	1
Site1	6	14	132	14	12	V1610	5	14	5x14	1	1
Site1	6	14	133	14	13	V1518	5	14	5x14	0	1
Site1	6	14	134	14	14	V1560	5	14	5x14	0	0
Site1	6	14	135	14	15	V1434	18	5	18x5	0	1
Site1	6	14	136	14	16	V1511	14	5	14x5	0	1
Site1	6	14	137	14	17	V1423	18	5	18x5	0	1
Site1	6	14	138	14	18	V1835	18	5	18x5	0	1
Site1	6	14	142	14	22	V1441	18	5	18x5	0	0
Site1	6	14	143	14	23	V1491	18	5	18x5	0	0
Site1	6	14	144	14	24	V1399	18	5	18x5	0	1
Site1	1	15	1	15	1	V1447	18	5	18x5	0	0
Site1	1	15	3	15	3	V1537	5	14	5x14	0	0
Site1	1	15	5	15	5	V878	18	5	18x5	0	0
Site1	1	15	6	15	6	V1348	18	5	18x5	0	0
Site1	1	15	7	15	7	V1639	5	14	5x14	1	0
Site1	1	15	8	15	8	V1603	5	14	5x14	0	1
Site1	1	15	9	15	9	V1415	18	5	18x5	0	1
Site1	1	15	10	15	10	V1524	5	14	5x14	1	0
Site1	1	15	13	15	13	V1765	14	0	14x.	0	1
Site1	1	15	14	15	14	V1561	5	14	5x14	0	0
Site1	1	15	19	15	19	V1504	14	5	14x5	0	1
Site1	1	15	20	15	20	V1386	18	5	18x5	0	1
Site1	2	15	25	15	1	V1339	18	5	18x5	0	0
Site1	2	15	26	15	2	V1580	5	14	5x14	0	1
Site1	2	15	28	15	4	V1364	18	5	18x5	0	1
Site1	2	15	30	15	6	V1840	22	0	22x.	0	0
Site1	2	15	32	15	8	V1493	18	5	18x5	0	0
Site1	2	15	33	15	9	V1560	5	14	5x14	0	0
Site1	2	15	34	15	10	V876	18	5	18x5	0	1
Site1	2	15	35	15	11	V1292	9	22	9x22	1	0
Site1	2	15	36	15	12	V1768	5	17	5x17	0	1
Site1	2	15	39	15	15	V1387	18	5	18x5	0	1
Site1	2	15	42	15	18	V1304	9	22	9x22	0	1
Site1	2	15	44	15	20	V1359	18	5	18x5	0	1
Site1	2	15	48	15	24	V1499	14	5	14x5	0	1
Site1	3	15	49	15	1	V1520	5	14	5x14	0	0
Site1	3	15	51	15	3	V1483	18	5	18x5	1	0
Site1	3	15	52	15	4	V19	12	6	12x6	0	0
Site1	3	15	55	15	7	V1775	5	20	5x20	0	1
Site1	3	15	58	15	10	V20	22	6	22x6	0	1
Site1	3	15	61	15	13	V1337	18	5	18x5	0	1
Site1	3	15	62	15	14	V7	21	5	21x5	0	0
Site1	3	15	63	15	15	V1511	14	5	14x5	0	1
Site1	3	15	64	15	16	V1822	12	5	12x5	0	0
Site1	3	15	66	15	18	V884	20	13	20x13	0	0
Site1	3	15	67	15	19	V1510	14	5	14x5	0	1
Site1	3	15	71	15	23	V1762	5	12	5x12	0	1
Site1	4	15	73	15	1	V1328	18	5	18x5	0	0
Site1	4	15	74	15	2	V875	18	5	18x5	0	0
Site1	4	15	75	15	3	V1297	9	22	9x22	0	0
Site1	4	15	79	15	7	V1341	18	5	18x5	0	1
Site1	4	15	80	15	8	V1816	21	22	21x22	0	1
Site1	4	15	86	15	14	V1446	18	5	18x5	1	1
Site1	4	15	87	15	15	V1380	18	5	18x5	0	0
Site1	4	15	88	15	16	V1650	5	14	5x14	0	1
Site1	4	15	90	15	18	V1393	18	5	18x5	0	1
Site1	4	15	91	15	19	V1379	18	5	18x5	0	1
Site1	4	15	92	15	20	V1470	18	5	18x5	0	1
Site1	4	15	93	15	21	V1481	18	5	18x5	0	1
Site1	4	15	94	15	22	V1490	18	5	18x5	0	1
Site1	4	15	95	15	23	V1413	18	5	18x5	0	1
Site1	5	15	97	15	1	V1407	18	5	18x5	0	0
Site1	5	15	98	15	2	V1269	9	22	9x22	0	1
Site1	5	15	99	15	3	V1585	5	14	5x14	0	1
Site1	5	15	100	15	4	V1760	5	0	5x.	0	0
Site1	5	15	103	15	7	V1830	18	5	18x5	0	0
Site1	5	15	104	15	8	V1646	5	14	5x14	0	1
Site1	5	15	105	15	9	V1435	18	5	18x5	0	0
Site1	5	15	106	15	10	V1764	5	17	5x17	0	0
Site1	5	15	107	15	11	V1374	18	5	18x5	0	0
Site1	5	15	108	15	12	V1542	5	14	5x14	1	1
Site1	5	15	110	15	14	V1345	18	5	18x5	0	1
Site1	5	15	112	15	16	V1386	18	5	18x5	0	1
Site1	5	15	113	15	17	V1527	5	14	5x14	0	1
Site1	5	15	116	15	20	V1493	18	5	18x5	0	0
Site1	5	15	117	15	21	V1619	5	14	5x14	0	0
Site1	5	15	118	15	22	V1517	5	14	5x14	0	1
Site1	6	15	121	15	1	V1500	14	5	14x5	0	0
Site1	6	15	123	15	3	V1356	18	5	18x5	0	1
Site1	6	15	124	15	4	V1378	18	5	18x5	1	0
Site1	6	15	125	15	5	V1328	18	5	18x5	0	0
Site1	6	15	126	15	6	V1509	14	5	14x5	0	1
Site1	6	15	127	15	7	V1298	9	22	9x22	0	1
Site1	6	15	128	15	8	V1565	5	14	5x14	0	0
Site1	6	15	129	15	9	V1773	14	0	14x.	0	0
Site1	6	15	130	15	10	V1785	21	5	21x5	0	0
Site1	6	15	131	15	11	V1406	18	5	18x5	0	0
Site1	6	15	132	15	12	V1455	18	5	18x5	1	1
Site1	6	15	135	15	15	V1396	18	5	18x5	1	1
Site1	6	15	136	15	16	V1501	14	5	14x5	0	1
Site1	6	15	137	15	17	V1803	12	5	12x5	0	0
Site1	6	15	138	15	18	V1382	18	5	18x5	0	1
Site1	6	15	139	15	19	V1508	14	5	14x5	0	0
Site1	6	15	142	15	22	V1387	18	5	18x5	0	1
Site1	1	16	4	16	4	V1424	18	5	18x5	1	0
Site1	1	16	5	16	5	V1433	18	5	18x5	0	1
Site1	1	16	6	16	6	V1435	18	5	18x5	0	1
Site1	1	16	9	16	9	V1655	5	14	5x14	0	1
Site1	1	16	16	16	16	V1825	18	5	18x5	0	1
Site1	1	16	18	16	18	V1648	5	14	5x14	0	1
Site1	1	16	21	16	21	V1459	18	5	18x5	0	0
Site1	2	16	25	16	1	V1	21	6	21x6	0	1
Site1	2	16	27	16	3	V1411	18	5	18x5	0	0
Site1	2	16	29	16	5	V1434	18	5	18x5	0	1
Site1	2	16	30	16	6	V1383	18	5	18x5	0	1
Site1	2	16	31	16	7	V1639	5	14	5x14	1	0
Site1	2	16	32	16	8	V1351	18	5	18x5	0	1
Site1	2	16	33	16	9	V1782	21	6	21x6	0	0
Site1	2	16	35	16	11	V1445	18	5	18x5	0	0
Site1	2	16	38	16	14	V1769	27	0	27x.	0	0
Site1	2	16	39	16	15	V1379	18	5	18x5	0	1
Site1	2	16	40	16	16	V1527	5	14	5x14	0	0
Site1	2	16	41	16	17	V1297	9	22	9x22	0	1
Site1	2	16	42	16	18	V1830	18	5	18x5	0	0
Site1	2	16	45	16	21	V1461	18	5	18x5	0	0
Site1	2	16	46	16	22	V1444	18	5	18x5	0	1
Site1	2	16	47	16	23	V1280	9	22	9x22	0	1
Site1	2	16	48	16	24	V1348	18	5	18x5	0	1
Site1	3	16	49	16	1	V1792	22	6	22x6	0	0
Site1	3	16	50	16	2	V1845	5	17	5x17	0	1
Site1	3	16	51	16	3	V1554	5	14	5x14	0	1
Site1	3	16	52	16	4	V1375	18	5	18x5	1	0
Site1	3	16	55	16	7	V1347	18	5	18x5	0	1
Site1	3	16	58	16	10	V1425	18	5	18x5	0	1
Site1	3	16	61	16	13	V1283	9	22	9x22	1	0
Site1	3	16	62	16	14	V1602	5	14	5x14	0	0
Site1	3	16	63	16	15	V1366	18	5	18x5	0	0
Site1	3	16	64	16	16	V1354	18	5	18x5	0	1
Site1	3	16	68	16	20	V1443	18	5	18x5	0	0
Site1	3	16	69	16	21	V1349	18	5	18x5	0	0
Site1	3	16	70	16	22	V875	18	5	18x5	0	0
Site1	3	16	72	16	24	V1569	5	14	5x14	0	0
Site1	4	16	73	16	1	V1780	21	22	21x22	0	1
Site1	4	16	74	16	2	V1418	18	5	18x5	0	1
Site1	4	16	75	16	3	V1592	5	14	5x14	0	0
Site1	4	16	76	16	4	V1836	18	5	18x5	0	1
Site1	4	16	77	16	5	V1510	14	5	14x5	0	0
Site1	4	16	78	16	6	V1408	18	5	18x5	0	1
Site1	4	16	80	16	8	V1383	18	5	18x5	0	1
Site1	4	16	83	16	11	V1439	18	5	18x5	0	0
Site1	4	16	87	16	15	V1440	18	5	18x5	0	1
Site1	4	16	88	16	16	V1493	18	5	18x5	0	1
Site1	4	16	91	16	19	V1279	9	22	9x22	0	1
Site1	4	16	94	16	22	V1344	18	5	18x5	0	1
Site1	4	16	96	16	24	V1298	9	22	9x22	0	0
Site1	5	16	100	16	4	V1815	22	0	22x.	0	1
Site1	5	16	101	16	5	V1565	5	14	5x14	0	0
Site1	5	16	103	16	7	V1802	21	22	21x22	0	1
Site1	5	16	105	16	9	V1811	21	5	21x5	0	1
Site1	5	16	106	16	10	V7	21	5	21x5	0	1
Site1	5	16	109	16	13	V1288	9	22	9x22	0	1
Site1	5	16	110	16	14	V1376	18	5	18x5	1	0
Site1	5	16	111	16	15	V1290	9	22	9x22	0	0
Site1	5	16	113	16	17	V1327	18	5	18x5	0	0
Site1	5	16	117	16	21	V872	3	11	3x11	0	0
Site1	6	16	122	16	2	V1828	18	5	18x5	0	1
Site1	6	16	125	16	5	V1487	18	5	18x5	0	1
Site1	6	16	126	16	6	V1827	18	5	18x5	0	1
Site1	6	16	127	16	7	V1339	18	5	18x5	0	0
Site1	6	16	128	16	8	V1386	18	5	18x5	0	1
Site1	6	16	129	16	9	V1418	18	5	18x5	0	0
Site1	6	16	134	16	14	V1537	5	14	5x14	0	1
Site1	6	16	136	16	16	V1762	5	12	5x12	0	1
Site1	6	16	138	16	18	V1822	12	5	12x5	0	1
Site1	6	16	139	16	19	V1497	18	5	18x5	0	1
Site2	1	1	1	1	1	V1835	18	5	18x5	0	0
Site2	1	1	2	1	2	V1315	9	22	9x22	0	1
Site2	1	1	3	1	3	V878	18	5	18x5	0	1
Site2	1	1	4	1	4	V1428	18	5	18x5	0	1
Site2	1	1	5	1	5	V1483	18	5	18x5	0	0
Site2	1	1	6	1	6	V1395	18	5	18x5	0	0
Site2	1	1	7	1	7	V1764	5	17	5x17	0	1
Site2	1	1	8	1	8	V1816	21	22	21x22	1	0
Site2	1	1	9	1	9	V1480	18	5	18x5	0	0
Site2	1	1	10	1	10	V1499	14	5	14x5	0	1
Site2	1	1	11	1	11	V1646	5	14	5x14	0	0
Site2	1	1	12	1	12	V1318	18	5	18x5	0	0
Site2	1	1	13	1	13	V1320	18	5	18x5	0	0
Site2	1	1	14	1	14	V1426	18	5	18x5	0	1
Site2	1	1	15	1	15	V1417	18	5	18x5	0	1
Site2	1	1	16	1	16	V1322	18	5	18x5	1	0
Site2	1	1	18	1	18	V1323	18	5	18x5	1	0
Site2	1	1	19	1	19	V1543	5	14	5x14	0	1
Site2	1	1	20	1	20	V1274	9	22	9x22	0	1
Site2	1	1	21	1	21	V9	21	5	21x5	1	0
Site2	1	1	22	1	22	V1371	18	5	18x5	0	0
Site2	1	1	23	1	23	V1510	14	5	14x5	0	0
Site2	2	1	25	1	1	V1379	18	5	18x5	0	1
Site2	2	1	26	1	2	V14	21	5	21x5	0	0
Site2	2	1	27	1	3	V1761	21	22	21x22	0	0
Site2	2	1	28	1	4	V1555	5	14	5x14	0	0
Site2	2	1	29	1	5	V1814	21	22	21x22	0	0
Site2	2	1	30	1	6	V1464	18	5	18x5	0	1
Site2	2	1	31	1	7	V1356	18	5	18x5	0	0
Site2	2	1	32	1	8	V1839	18	5	18x5	0	0
Site2	2	1	33	1	9	V1801	12	0	12x.	0	0
Site2	2	1	34	1	10	V1494	18	5	18x5	0	1
Site2	2	1	35	1	11	V1845	5	17	5x17	0	1
Site2	2	1	36	1	12	V1440	18	5	18x5	1	1
Site2	2	1	37	1	13	V1334	18	5	18x5	0	0
Site2	2	1	38	1	14	V1411	18	5	18x5	1	0
Site2	2	1	39	1	15	V887	5	0	5x.	0	0
Site2	2	1	40	1	16	V1272	9	22	9x22	0	0
Site2	2	1	42	1	18	V1537	5	14	5x14	0	0
Site2	2	1	43	1	19	V1324	18	5	18x5	1	0
Site2	2	1	44	1	20	V1546	5	14	5x14	0	1
Site2	2	1	45	1	21	V1639	5	14	5x14	1	0
Site2	2	1	46	1	22	V1428	18	5	18x5	0	0
Site2	2	1	47	1	23	V1380	18	5	18x5	0	0
Site2	2	1	48	1	24	V1524	5	14	5x14	1	1
Site2	3	1	50	1	2	V1448	18	5	18x5	1	1
Site2	3	1	51	1	3	V1485	18	5	18x5	1	1
Site2	3	1	52	1	4	V1436	18	5	18x5	0	0
Site2	3	1	53	1	5	V1807	21	22	21x22	1	0
Site2	3	1	54	1	6	V1483	18	5	18x5	0	0
Site2	3	1	55	1	7	V1350	18	5	18x5	0	1
Site2	3	1	56	1	8	V885	14	0	14x.	0	0
Site2	3	1	57	1	9	V1392	18	5	18x5	0	1
Site2	3	1	58	1	10	V1487	18	5	18x5	1	0
Site2	3	1	59	1	11	V1420	18	5	18x5	0	1
Site2	3	1	60	1	12	V1385	18	5	18x5	0	1
Site2	3	1	61	1	13	V1512	14	5	14x5	0	0
Site2	3	1	62	1	14	V1394	18	5	18x5	0	1
Site2	3	1	63	1	15	V1362	18	5	18x5	0	0
Site2	3	1	64	1	16	V1411	18	5	18x5	1	1
Site2	3	1	65	1	17	V1770	5	17	5x17	0	0
Site2	3	1	66	1	18	V1449	18	5	18x5	0	0
Site2	3	1	67	1	19	V1836	18	5	18x5	0	1
Site2	3	1	68	1	20	V1800	21	5	21x5	0	0
Site2	3	1	69	1	21	V1325	18	5	18x5	0	1
Site2	3	1	70	1	22	V1831	18	5	18x5	0	1
Site2	3	1	71	1	23	V1555	5	14	5x14	0	0
Site2	3	1	72	1	24	V1354	18	5	18x5	0	0
Site2	4	1	73	1	1	V1602	5	14	5x14	0	0
Site2	4	1	74	1	2	V1432	18	5	18x5	0	1
Site2	4	1	75	1	3	V1429	18	5	18x5	0	1
Site2	4	1	76	1	4	V1502	14	5	14x5	0	0
Site2	4	1	78	1	6	V1763	5	20	5x20	0	1
Site2	4	1	79	1	7	V1761	21	22	21x22	0	0
Site2	4	1	80	1	8	V1475	18	5	18x5	0	0
Site2	4	1	81	1	9	V8	21	5	21x5	1	0
Site2	4	1	82	1	10	V1830	18	5	18x5	0	0
Site2	4	1	83	1	11	V1510	14	5	14x5	0	0
Site2	4	1	84	1	12	V1369	18	5	18x5	0	0
Site2	4	1	85	1	13	V1431	18	5	18x5	0	0
Site2	4	1	86	1	14	V1306	9	22	9x22	1	1
Site2	4	1	87	1	15	V1499	14	5	14x5	0	0
Site2	4	1	89	1	17	V1652	5	14	5x14	0	0
Site2	4	1	90	1	18	V1339	18	5	18x5	1	0
Site2	4	1	91	1	19	V1622	5	14	5x14	1	0
Site2	4	1	92	1	20	V1388	18	5	18x5	0	0
Site2	4	1	93	1	21	V1399	18	5	18x5	0	0
Site2	4	1	95	1	23	V1838	12	5	12x5	0	0
Site2	5	1	97	1	1	V1823	12	5	12x5	0	0
Site2	5	1	98	1	2	V1451	18	5	18x5	0	0
Site2	5	1	100	1	4	V1371	18	5	18x5	0	0
Site2	5	1	101	1	5	V1420	18	5	18x5	0	1
Site2	5	1	102	1	6	V1273	9	22	9x22	0	0
Site2	5	1	103	1	7	V1571	5	14	5x14	0	0
Site2	5	1	105	1	9	V1498	18	5	18x5	0	1
Site2	5	1	106	1	10	V1786	21	22	21x22	1	0
Site2	5	1	107	1	11	V1500	14	5	14x5	0	0
Site2	5	1	108	1	12	V1289	9	22	9x22	1	0
Site2	5	1	110	1	14	V12	21	5	21x5	0	0
Site2	5	1	111	1	15	V1543	5	14	5x14	0	0
Site2	5	1	113	1	17	V1813	21	22	21x22	1	0
Site2	5	1	114	1	18	V1473	18	5	18x5	0	0
Site2	5	1	115	1	19	V1374	18	5	18x5	0	0
Site2	5	1	116	1	20	V1614	5	14	5x14	0	0
Site2	5	1	117	1	21	V1327	18	5	18x5	0	0
Site2	5	1	118	1	22	V1844	5	17	5x17	0	0
Site2	6	1	121	1	1	V1440	18	5	18x5	0	1
Site2	6	1	122	1	2	V1561	5	14	5x14	0	0
Site2	6	1	123	1	3	V1363	18	5	18x5	0	1
Site2	6	1	124	1	4	V1436	18	5	18x5	1	1
Site2	6	1	125	1	5	V1481	18	5	18x5	0	0
Site2	6	1	126	1	6	V1417	18	5	18x5	0	0
Site2	6	1	127	1	7	V1353	18	5	18x5	1	1
Site2	6	1	129	1	9	V1836	18	5	18x5	0	1
Site2	6	1	130	1	10	V1410	18	5	18x5	0	1
Site2	6	1	131	1	11	V1653	5	14	5x14	0	1
Site2	6	1	132	1	12	V1815	22	0	22x.	0	0
Site2	6	1	133	1	13	V878	18	5	18x5	0	0
Site2	6	1	134	1	14	V1341	18	5	18x5	0	0
Site2	6	1	135	1	15	V1381	18	5	18x5	0	0
Site2	6	1	137	1	17	V1279	9	22	9x22	0	1
Site2	6	1	138	1	18	V9	21	5	21x5	0	1
Site2	6	1	139	1	19	V1513	14	5	14x5	0	1
Site2	6	1	140	1	20	V1362	18	5	18x5	1	0
Site2	6	1	142	1	22	V1441	18	5	18x5	0	0
Site2	6	1	143	1	23	V1437	18	5	18x5	0	0
Site2	6	1	144	1	24	V1495	18	5	18x5	0	1
Site2	1	2	1	2	1	V1282	9	22	9x22	0	1
Site2	1	2	2	2	2	V1610	5	14	5x14	0	0
Site2	1	2	3	2	3	V1485	18	5	18x5	0	1
Site2	1	2	5	2	5	V1359	18	5	18x5	1	1
Site2	1	2	6	2	6	V1844	5	17	5x17	0	0
Site2	1	2	7	2	7	V1299	9	22	9x22	0	1
Site2	1	2	8	2	8	V1312	9	22	9x22	0	0
Site2	1	2	9	2	9	V1400	18	5	18x5	0	1
Site2	1	2	10	2	10	V885	14	0	14x.	0	0
Site2	1	2	11	2	11	V1404	18	5	18x5	0	0
Site2	1	2	12	2	12	V1821	21	22	21x22	1	0
Site2	1	2	13	2	13	V1798	22	0	22x.	0	0
Site2	1	2	14	2	14	V1380	18	5	18x5	0	0
Site2	1	2	15	2	15	V1383	18	5	18x5	0	1
Site2	1	2	17	2	17	V1275	9	22	9x22	0	1
Site2	1	2	18	2	18	V1765	14	0	14x.	0	1
Site2	1	2	20	2	20	V17	21	5	21x5	0	0
Site2	1	2	21	2	21	V1512	14	5	14x5	1	0
Site2	1	2	22	2	22	V1777	12	22	12x22	0	0
Site2	1	2	23	2	23	V1352	18	5	18x5	0	0
Site2	2	2	25	2	1	V1820	21	22	21x22	0	0
Site2	2	2	28	2	4	V1825	18	5	18x5	0	0
Site2	2	2	29	2	5	V1431	18	5	18x5	0	0
Site2	2	2	30	2	6	V1763	5	20	5x20	0	0
Site2	2	2	31	2	7	V1407	18	5	18x5	0	1
Site2	2	2	32	2	8	V1594	5	14	5x14	1	1
Site2	2	2	33	2	9	V1466	18	5	18x5	1	0
Site2	2	2	34	2	10	V1365	18	5	18x5	0	0
Site2	2	2	35	2	11	V1530	5	14	5x14	0	0
Site2	2	2	36	2	12	V1815	22	0	22x.	0	0
Site2	2	2	37	2	13	V1436	18	5	18x5	0	0
Site2	2	2	38	2	14	V1633	5	14	5x14	0	0
Site2	2	2	39	2	15	V1325	18	5	18x5	1	0
Site2	2	2	40	2	16	V1819	21	22	21x22	1	1
Site2	2	2	41	2	17	V1809	21	22	21x22	1	0
Site2	2	2	42	2	18	V1282	9	22	9x22	0	0
Site2	2	2	43	2	19	V1511	14	5	14x5	0	1
Site2	2	2	45	2	21	V1385	18	5	18x5	0	1
Site2	2	2	47	2	23	V1329	18	5	18x5	0	0
Site2	2	2	48	2	24	V1306	9	22	9x22	1	0
Site2	3	2	49	2	1	V1358	18	5	18x5	1	0
Site2	3	2	50	2	2	V1773	14	0	14x.	0	0
Site2	3	2	51	2	3	V1332	18	5	18x5	1	0
Site2	3	2	52	2	4	V1632	5	14	5x14	1	1
Site2	3	2	53	2	5	V1418	18	5	18x5	1	0
Site2	3	2	54	2	6	V1367	18	5	18x5	1	0
Site2	3	2	55	2	7	V1813	21	22	21x22	1	0
Site2	3	2	56	2	8	V1413	18	5	18x5	0	0
Site2	3	2	57	2	9	V1629	5	14	5x14	0	0
Site2	3	2	58	2	10	V1814	21	22	21x22	1	0
Site2	3	2	59	2	11	V1407	18	5	18x5	0	0
Site2	3	2	60	2	12	V1400	18	5	18x5	0	0
Site2	3	2	61	2	13	V1515	5	14	5x14	0	1
Site2	3	2	62	2	14	V1288	9	22	9x22	1	0
Site2	3	2	64	2	16	V1790	21	22	21x22	1	0
Site2	3	2	65	2	17	V1355	18	5	18x5	0	1
Site2	3	2	66	2	18	V1331	18	5	18x5	0	0
Site2	3	2	67	2	19	V1816	21	22	21x22	0	1
Site2	3	2	68	2	20	V1353	18	5	18x5	1	1
Site2	3	2	69	2	21	V1298	9	22	9x22	0	0
Site2	3	2	70	2	22	V1792	22	6	22x6	0	1
Site2	3	2	72	2	24	V5	21	6	21x6	0	0
Site2	4	2	73	2	1	V1492	18	5	18x5	0	0
Site2	4	2	75	2	3	V1375	18	5	18x5	0	0
Site2	4	2	76	2	4	V1563	5	14	5x14	1	0
Site2	4	2	77	2	5	V1469	18	5	18x5	0	0
Site2	4	2	78	2	6	V19	12	6	12x6	0	0
Site2	4	2	80	2	8	V1389	18	5	18x5	0	0
Site2	4	2	81	2	9	V1659	5	14	5x14	0	1
Site2	4	2	82	2	10	V1453	18	5	18x5	0	0
Site2	4	2	84	2	12	V1408	18	5	18x5	1	0
Site2	4	2	85	2	13	V1480	18	5	18x5	1	1
Site2	4	2	87	2	15	V887	5	0	5x.	0	0
Site2	4	2	88	2	16	V1376	18	5	18x5	1	0
Site2	4	2	89	2	17	V1317	9	22	9x22	1	0
Site2	4	2	90	2	18	V1481	18	5	18x5	0	0
Site2	4	2	91	2	19	V1450	18	5	18x5	0	1
Site2	4	2	92	2	20	V1447	18	5	18x5	0	0
Site2	4	2	93	2	21	V1493	18	5	18x5	0	0
Site2	4	2	94	2	22	V1827	18	5	18x5	0	0
Site2	4	2	96	2	24	V1323	18	5	18x5	0	0
Site2	5	2	97	2	1	V1348	18	5	18x5	0	0
Site2	5	2	99	2	3	V1275	9	22	9x22	0	1
Site2	5	2	100	2	4	V1817	12	5	12x5	0	0
Site2	5	2	101	2	5	V1342	18	5	18x5	1	0
Site2	5	2	102	2	6	V1356	18	5	18x5	0	0
Site2	5	2	103	2	7	V1502	14	5	14x5	0	1
Site2	5	2	105	2	9	V1414	18	5	18x5	0	0
Site2	5	2	106	2	10	V1828	18	5	18x5	0	0
Site2	5	2	107	2	11	V889	5	0	5x.	0	0
Site2	5	2	108	2	12	V1790	21	22	21x22	0	0
Site2	5	2	109	2	13	V14	21	5	21x5	0	0
Site2	5	2	111	2	15	V1503	14	5	14x5	1	0
Site2	5	2	112	2	16	V1293	9	22	9x22	0	1
Site2	5	2	113	2	17	V1340	18	5	18x5	1	0
Site2	5	2	114	2	18	V1493	18	5	18x5	0	0
Site2	5	2	115	2	19	V1663	5	14	5x14	0	0
Site2	5	2	116	2	20	V1394	18	5	18x5	0	1
Site2	5	2	117	2	21	V1769	27	0	27x.	1	0
Site2	5	2	118	2	22	V1306	9	22	9x22	1	1
Site2	5	2	119	2	23	V1775	5	20	5x20	0	0
Site2	5	2	120	2	24	V1397	18	5	18x5	0	1
Site2	6	2	121	2	1	V1340	18	5	18x5	0	1
Site2	6	2	122	2	2	V1327	18	5	18x5	0	1
Site2	6	2	123	2	3	V1434	18	5	18x5	0	1
Site2	6	2	124	2	4	V1435	18	5	18x5	0	0
Site2	6	2	125	2	5	V1465	18	5	18x5	0	0
Site2	6	2	126	2	6	V1512	14	5	14x5	0	0
Site2	6	2	128	2	8	V1357	18	5	18x5	0	1
Site2	6	2	129	2	9	V1415	18	5	18x5	1	0
Site2	6	2	131	2	11	V1762	5	12	5x12	0	1
Site2	6	2	132	2	12	V1356	18	5	18x5	0	0
Site2	6	2	133	2	13	V1322	18	5	18x5	0	0
Site2	6	2	134	2	14	V1518	5	14	5x14	0	0
Site2	6	2	136	2	16	V1411	18	5	18x5	0	0
Site2	6	2	137	2	17	V1652	5	14	5x14	0	0
Site2	6	2	138	2	18	V1467	18	5	18x5	0	0
Site2	6	2	139	2	19	V1407	18	5	18x5	1	0
Site2	6	2	140	2	20	V1798	22	0	22x.	0	1
Site2	6	2	141	2	21	V1602	5	14	5x14	0	1
Site2	6	2	143	2	23	V1519	5	14	5x14	0	0
Site2	6	2	144	2	24	V1769	27	0	27x.	0	1
Site2	1	3	1	3	1	V1418	18	5	18x5	1	0
Site2	1	3	2	3	2	V1655	5	14	5x14	0	0
Site2	1	3	3	3	3	V1836	18	5	18x5	0	1
Site2	1	3	4	3	4	V1308	9	22	9x22	0	0
Site2	1	3	5	3	5	V1827	18	5	18x5	0	0
Site2	1	3	6	3	6	V1303	9	22	9x22	0	1
Site2	1	3	8	3	8	V884	20	13	20x13	0	0
Site2	1	3	9	3	9	V1514	5	14	5x14	0	0
Site2	1	3	10	3	10	V1580	5	14	5x14	0	0
Site2	1	3	11	3	11	V13	21	5	21x5	0	1
Site2	1	3	12	3	12	V1393	18	5	18x5	0	1
Site2	1	3	13	3	13	V1394	18	5	18x5	0	0
Site2	1	3	14	3	14	V1796	21	22	21x22	1	0
Site2	1	3	15	3	15	V1569	5	14	5x14	1	0
Site2	1	3	16	3	16	V1810	21	5	21x5	1	0
Site2	1	3	17	3	17	V1461	18	5	18x5	0	0
Site2	1	3	18	3	18	V1650	5	14	5x14	0	0
Site2	1	3	19	3	19	V1813	21	22	21x22	1	0
Site2	1	3	20	3	20	V1762	5	12	5x12	0	0
Site2	1	3	21	3	21	V1484	18	5	18x5	0	0
Site2	1	3	23	3	23	V875	18	5	18x5	1	1
Site2	1	3	24	3	24	V20	22	6	22x6	0	0
Site2	2	3	25	3	1	V1764	5	17	5x17	0	1
Site2	2	3	26	3	2	V1357	18	5	18x5	0	1
Site2	2	3	27	3	3	V1501	14	5	14x5	0	1
Site2	2	3	28	3	4	V9	21	5	21x5	0	0
Site2	2	3	29	3	5	V1342	18	5	18x5	1	0
Site2	2	3	30	3	6	V6	21	5	21x5	0	0
Site2	2	3	31	3	7	V1446	18	5	18x5	0	1
Site2	2	3	34	3	10	V1349	18	5	18x5	0	0
Site2	2	3	35	3	11	V1569	5	14	5x14	0	0
Site2	2	3	36	3	12	V1463	18	5	18x5	0	0
Site2	2	3	37	3	13	V1816	21	22	21x22	0	0
Site2	2	3	38	3	14	V1482	18	5	18x5	0	0
Site2	2	3	39	3	15	V875	18	5	18x5	0	0
Site2	2	3	40	3	16	V1602	5	14	5x14	0	0
Site2	2	3	41	3	17	V1648	5	14	5x14	0	0
Site2	2	3	42	3	18	V1833	18	5	18x5	1	0
Site2	2	3	43	3	19	V1829	18	5	18x5	0	0
Site2	2	3	44	3	20	V1610	5	14	5x14	0	0
Site2	2	3	45	3	21	V1541	5	14	5x14	0	0
Site2	2	3	46	3	22	V1543	5	14	5x14	0	1
Site2	2	3	48	3	24	V1429	18	5	18x5	0	0
Site2	3	3	49	3	1	V1270	9	22	9x22	0	1
Site2	3	3	50	3	2	V1565	5	14	5x14	1	0
Site2	3	3	51	3	3	V1303	9	22	9x22	0	0
Site2	3	3	53	3	5	V1375	18	5	18x5	0	0
Site2	3	3	54	3	6	V1762	5	12	5x12	0	0
Site2	3	3	55	3	7	V1546	5	14	5x14	1	1
Site2	3	3	56	3	8	V1464	18	5	18x5	0	0
Site2	3	3	57	3	9	V1406	18	5	18x5	0	0
Site2	3	3	58	3	10	V1289	9	22	9x22	1	0
Site2	3	3	59	3	11	V1409	18	5	18x5	0	0
Site2	3	3	60	3	12	V1427	18	5	18x5	0	1
Site2	3	3	61	3	13	V1393	18	5	18x5	1	1
Site2	3	3	62	3	14	V1374	18	5	18x5	0	0
Site2	3	3	63	3	15	V1833	18	5	18x5	0	1
Site2	3	3	64	3	16	V1771	5	17	5x17	0	1
Site2	3	3	65	3	17	V884	20	13	20x13	0	0
Site2	3	3	66	3	18	V1292	9	22	9x22	1	0
Site2	3	3	67	3	19	V1368	18	5	18x5	0	0
Site2	3	3	68	3	20	V1314	9	22	9x22	0	0
Site2	3	3	69	3	21	V1414	18	5	18x5	0	0
Site2	3	3	70	3	22	V1801	12	0	12x.	0	0
Site2	3	3	71	3	23	V1283	9	22	9x22	1	1
Site2	3	3	72	3	24	V1452	18	5	18x5	0	0
Site2	4	3	74	3	2	V1418	18	5	18x5	0	0
Site2	4	3	75	3	3	V1349	18	5	18x5	0	0
Site2	4	3	76	3	4	V1570	5	14	5x14	0	0
Site2	4	3	77	3	5	V1807	21	22	21x22	0	0
Site2	4	3	78	3	6	V1835	18	5	18x5	0	1
Site2	4	3	79	3	7	V1329	18	5	18x5	0	0
Site2	4	3	80	3	8	V1324	18	5	18x5	0	0
Site2	4	3	81	3	9	V1484	18	5	18x5	1	0
Site2	4	3	82	3	10	V1594	5	14	5x14	1	1
Site2	4	3	83	3	11	V1397	18	5	18x5	0	1
Site2	4	3	84	3	12	V1522	5	14	5x14	0	0
Site2	4	3	85	3	13	V1436	18	5	18x5	1	1
Site2	4	3	86	3	14	V1370	18	5	18x5	1	0
Site2	4	3	87	3	15	V1336	18	5	18x5	1	0
Site2	4	3	88	3	16	V1386	18	5	18x5	1	0
Site2	4	3	90	3	18	V1405	18	5	18x5	0	1
Site2	4	3	91	3	19	V1424	18	5	18x5	0	0
Site2	4	3	92	3	20	V1309	9	22	9x22	1	0
Site2	4	3	93	3	21	V1805	12	0	12x.	0	0
Site2	4	3	94	3	22	V16	21	5	21x5	1	0
Site2	4	3	96	3	24	V1506	14	5	14x5	0	0
Site2	5	3	98	3	2	V1347	18	5	18x5	0	0
Site2	5	3	99	3	3	V1377	18	5	18x5	0	0
Site2	5	3	101	3	5	V1776	5	12	5x12	0	0
Site2	5	3	103	3	7	V888	5	0	5x.	1	0
Site2	5	3	104	3	8	V1454	18	5	18x5	0	1
Site2	5	3	106	3	10	V7	21	5	21x5	0	0
Site2	5	3	107	3	11	V1524	5	14	5x14	1	0
Site2	5	3	108	3	12	V1339	18	5	18x5	0	0
Site2	5	3	109	3	13	V1499	14	5	14x5	0	0
Site2	5	3	110	3	14	V1556	5	14	5x14	0	0
Site2	5	3	111	3	15	V1560	5	14	5x14	0	0
Site2	5	3	112	3	16	V1346	18	5	18x5	0	0
Site2	5	3	113	3	17	V1375	18	5	18x5	1	0
Site2	5	3	114	3	18	V1278	9	22	9x22	1	1
Site2	5	3	115	3	19	V1825	18	5	18x5	0	1
Site2	5	3	116	3	20	V1388	18	5	18x5	0	1
Site2	5	3	117	3	21	V1359	18	5	18x5	0	1
Site2	5	3	118	3	22	V1480	18	5	18x5	0	1
Site2	5	3	119	3	23	V1400	18	5	18x5	0	0
Site2	5	3	120	3	24	V1819	21	22	21x22	1	0
Site2	6	3	121	3	1	V1830	18	5	18x5	0	0
Site2	6	3	122	3	2	V1772	14	0	14x.	0	0
Site2	6	3	124	3	4	V879	18	5	18x5	0	1
Site2	6	3	125	3	5	V1470	18	5	18x5	0	1
Site2	6	3	126	3	6	V1789	21	22	21x22	0	1
Site2	6	3	127	3	7	V1372	18	5	18x5	0	1
Site2	6	3	128	3	8	V1290	9	22	9x22	0	1
Site2	6	3	129	3	9	V1307	9	22	9x22	0	0
Site2	6	3	130	3	10	V1342	18	5	18x5	0	1
Site2	6	3	132	3	12	V1452	18	5	18x5	0	0
Site2	6	3	133	3	13	V1494	18	5	18x5	0	0
Site2	6	3	134	3	14	V1493	18	5	18x5	0	0
Site2	6	3	135	3	15	V1486	18	5	18x5	0	1
Site2	6	3	136	3	16	V1500	14	5	14x5	1	1
Site2	6	3	137	3	17	V1804	12	0	12x.	0	0
Site2	6	3	138	3	18	V1483	18	5	18x5	1	0
Site2	6	3	140	3	20	V1297	9	22	9x22	0	0
Site2	6	3	141	3	21	V1328	18	5	18x5	1	0
Site2	6	3	142	3	22	V1826	18	5	18x5	0	1
Site2	6	3	143	3	23	V1413	18	5	18x5	0	1
Site2	1	4	1	4	1	V1268	9	22	9x22	0	0
Site2	1	4	2	4	2	V1479	18	5	18x5	0	0
Site2	1	4	3	4	3	V1307	9	22	9x22	0	0
Site2	1	4	4	4	4	V1304	9	22	9x22	1	1
Site2	1	4	6	4	6	V1571	5	14	5x14	0	0
Site2	1	4	7	4	7	V1327	18	5	18x5	0	0
Site2	1	4	8	4	8	V1659	5	14	5x14	0	0
Site2	1	4	9	4	9	V1763	5	20	5x20	1	1
Site2	1	4	10	4	10	V1815	22	0	22x.	0	1
Site2	1	4	12	4	12	V1446	18	5	18x5	0	0
Site2	1	4	14	4	14	V1306	9	22	9x22	1	0
Site2	1	4	15	4	15	V18	12	6	12x6	1	0
Site2	1	4	16	4	16	V1272	9	22	9x22	0	1
Site2	1	4	17	4	17	V1457	18	5	18x5	0	0
Site2	1	4	18	4	18	V1364	18	5	18x5	0	0
Site2	1	4	19	4	19	V1783	21	22	21x22	1	0
Site2	1	4	20	4	20	V1565	5	14	5x14	0	0
Site2	1	4	21	4	21	V1527	5	14	5x14	0	0
Site2	1	4	22	4	22	V1503	14	5	14x5	0	1
Site2	1	4	23	4	23	V1336	18	5	18x5	1	0
Site2	1	4	24	4	24	V1434	18	5	18x5	0	1
Site2	2	4	25	4	1	V890	5	0	5x.	0	0
Site2	2	4	26	4	2	V1399	18	5	18x5	0	0
Site2	2	4	27	4	3	V1288	9	22	9x22	0	1
Site2	2	4	28	4	4	V1445	18	5	18x5	0	0
Site2	2	4	29	4	5	V1341	18	5	18x5	0	0
Site2	2	4	31	4	7	V20	22	6	22x6	0	0
Site2	2	4	32	4	8	V1799	22	0	22x.	0	0
Site2	2	4	34	4	10	V874	18	5	18x5	0	1
Site2	2	4	35	4	11	V1570	5	14	5x14	0	0
Site2	2	4	36	4	12	V1403	18	5	18x5	0	0
Site2	2	4	37	4	13	V1278	9	22	9x22	1	1
Site2	2	4	38	4	14	V5	21	6	21x6	0	1
Site2	2	4	39	4	15	V1767	14	0	14x.	0	1
Site2	2	4	40	4	16	V1493	18	5	18x5	0	1
Site2	2	4	41	4	17	V1768	5	17	5x17	0	0
Site2	2	4	42	4	18	V1838	12	5	12x5	0	0
Site2	2	4	43	4	19	V1626	5	14	5x14	0	0
Site2	2	4	44	4	20	V1372	18	5	18x5	0	0
Site2	2	4	45	4	21	V1762	5	12	5x12	0	0
Site2	2	4	46	4	22	V4	21	6	21x6	0	0
Site2	2	4	47	4	23	V1289	9	22	9x22	1	1
Site2	2	4	48	4	24	V1301	9	22	9x22	0	1
Site2	3	4	49	4	1	V1378	18	5	18x5	0	0
Site2	3	4	50	4	2	V1776	5	12	5x12	1	0
Site2	3	4	51	4	3	V1774	5	20	5x20	1	1
Site2	3	4	52	4	4	V1429	18	5	18x5	0	0
Site2	3	4	54	4	6	V1484	18	5	18x5	0	1
Site2	3	4	56	4	8	V15	21	5	21x5	0	0
Site2	3	4	57	4	9	V1652	5	14	5x14	0	1
Site2	3	4	58	4	10	V1329	18	5	18x5	0	0
Site2	3	4	59	4	11	V1357	18	5	18x5	0	1
Site2	3	4	60	4	12	V1474	18	5	18x5	0	0
Site2	3	4	61	4	13	V1323	18	5	18x5	0	0
Site2	3	4	62	4	14	V1478	18	5	18x5	0	0
Site2	3	4	63	4	15	V1828	18	5	18x5	0	1
Site2	3	4	65	4	17	V1569	5	14	5x14	0	0
Site2	3	4	66	4	18	V1655	5	14	5x14	0	0
Site2	3	4	67	4	19	V1379	18	5	18x5	0	1
Site2	3	4	68	4	20	V1834	18	5	18x5	0	1
Site2	3	4	69	4	21	V1415	18	5	18x5	0	0
Site2	3	4	70	4	22	V1496	18	5	18x5	1	0
Site2	3	4	71	4	23	V1838	12	5	12x5	0	0
Site2	4	4	73	4	1	V1642	5	14	5x14	1	1
Site2	4	4	74	4	2	V1771	5	17	5x17	0	0
Site2	4	4	75	4	3	V1358	18	5	18x5	1	0
Site2	4	4	76	4	4	V1454	18	5	18x5	0	1
Site2	4	4	77	4	5	V1303	9	22	9x22	0	1
Site2	4	4	78	4	6	V1663	5	14	5x14	0	0
Site2	4	4	80	4	8	V1633	5	14	5x14	1	1
Site2	4	4	81	4	9	V1554	5	14	5x14	0	1
Site2	4	4	82	4	10	V1355	18	5	18x5	1	0
Site2	4	4	83	4	11	V1373	18	5	18x5	0	0
Site2	4	4	84	4	12	V1359	18	5	18x5	0	1
Site2	4	4	85	4	13	V3	21	6	21x6	0	1
Site2	4	4	87	4	15	V1351	18	5	18x5	0	1
Site2	4	4	88	4	16	V1378	18	5	18x5	1	0
Site2	4	4	89	4	17	V1465	18	5	18x5	0	1
Site2	4	4	90	4	18	V1320	18	5	18x5	0	0
Site2	4	4	91	4	19	V1537	5	14	5x14	1	0
Site2	4	4	92	4	20	V1275	9	22	9x22	0	0
Site2	4	4	93	4	21	V1427	18	5	18x5	0	1
Site2	4	4	94	4	22	V1422	18	5	18x5	0	1
Site2	4	4	95	4	23	V1449	18	5	18x5	0	0
Site2	4	4	96	4	24	V1791	21	22	21x22	0	1
Site2	5	4	97	4	1	V1772	14	0	14x.	0	0
Site2	5	4	98	4	2	V1475	18	5	18x5	1	0
Site2	5	4	100	4	4	V1357	18	5	18x5	1	1
Site2	5	4	101	4	5	V1380	18	5	18x5	1	0
Site2	5	4	102	4	6	V1527	5	14	5x14	0	0
Site2	5	4	103	4	7	V1269	9	22	9x22	0	0
Site2	5	4	106	4	10	V1810	21	5	21x5	0	0
Site2	5	4	107	4	11	V1807	21	22	21x22	0	0
Site2	5	4	108	4	12	V875	18	5	18x5	1	0
Site2	5	4	109	4	13	V3	21	6	21x6	0	0
Site2	5	4	110	4	14	V1465	18	5	18x5	0	1
Site2	5	4	111	4	15	V9	21	5	21x5	0	0
Site2	5	4	112	4	16	V1782	21	6	21x6	0	0
Site2	5	4	114	4	18	V1783	21	22	21x22	0	0
Site2	5	4	115	4	19	V1765	14	0	14x.	1	1
Site2	5	4	116	4	20	V1441	18	5	18x5	0	0
Site2	5	4	117	4	21	V1476	18	5	18x5	0	0
Site2	5	4	118	4	22	V1271	9	22	9x22	1	0
Site2	5	4	119	4	23	V1379	18	5	18x5	0	1
Site2	5	4	120	4	24	V1483	18	5	18x5	0	1
Site2	6	4	122	4	2	V1321	18	5	18x5	0	0
Site2	6	4	123	4	3	V1330	18	5	18x5	0	0
Site2	6	4	124	4	4	V1510	14	5	14x5	0	1
Site2	6	4	125	4	5	V1397	18	5	18x5	1	1
Site2	6	4	126	4	6	V1841	22	5	22x5	0	1
Site2	6	4	127	4	7	V1650	5	14	5x14	0	0
Site2	6	4	128	4	8	V1765	14	0	14x.	1	1
Site2	6	4	129	4	9	V1478	18	5	18x5	1	1
Site2	6	4	130	4	10	V1562	5	14	5x14	0	1
Site2	6	4	131	4	11	V1377	18	5	18x5	0	1
Site2	6	4	132	4	12	V1468	18	5	18x5	1	1
Site2	6	4	133	4	13	V1568	5	14	5x14	1	0
Site2	6	4	134	4	14	V1278	9	22	9x22	0	1
Site2	6	4	135	4	15	V1333	18	5	18x5	0	1
Site2	6	4	136	4	16	V1386	18	5	18x5	0	0
Site2	6	4	137	4	17	V1542	5	14	5x14	1	0
Site2	6	4	138	4	18	V1817	12	5	12x5	0	0
Site2	6	4	139	4	19	V1408	18	5	18x5	0	0
Site2	6	4	140	4	20	V1401	18	5	18x5	0	0
Site2	6	4	142	4	22	V20	22	6	22x6	0	0
Site2	6	4	143	4	23	V1387	18	5	18x5	0	0
Site2	6	4	144	4	24	V1355	18	5	18x5	0	1
Site2	1	5	1	5	1	V1325	18	5	18x5	1	1
Site2	1	5	2	5	2	V1401	18	5	18x5	0	1
Site2	1	5	4	5	4	V1603	5	14	5x14	0	1
Site2	1	5	5	5	5	V1833	18	5	18x5	1	0
Site2	1	5	6	5	6	V1775	5	20	5x20	0	0
Site2	1	5	7	5	7	V1504	14	5	14x5	0	0
Site2	1	5	8	5	8	V1441	18	5	18x5	0	1
Site2	1	5	9	5	9	V1476	18	5	18x5	0	1
Site2	1	5	10	5	10	V1313	9	22	9x22	0	0
Site2	1	5	11	5	11	V1642	5	14	5x14	1	1
Site2	1	5	12	5	12	V880	18	5	18x5	0	0
Site2	1	5	13	5	13	V1409	18	5	18x5	0	0
Site2	1	5	14	5	14	V1465	18	5	18x5	0	0
Site2	1	5	15	5	15	V1456	18	5	18x5	0	1
Site2	1	5	16	5	16	V1611	5	14	5x14	0	0
Site2	1	5	17	5	17	V1392	18	5	18x5	0	0
Site2	1	5	18	5	18	V1424	18	5	18x5	0	0
Site2	1	5	20	5	20	V1548	5	14	5x14	0	0
Site2	1	5	22	5	22	V1828	18	5	18x5	1	0
Site2	1	5	23	5	23	V1360	18	5	18x5	0	0
Site2	2	5	25	5	1	V878	18	5	18x5	0	1
Site2	2	5	26	5	2	V1488	18	5	18x5	0	1
Site2	2	5	27	5	3	V1418	18	5	18x5	1	0
Site2	2	5	28	5	4	V1304	9	22	9x22	0	1
Site2	2	5	29	5	5	V1397	18	5	18x5	0	1
Site2	2	5	30	5	6	V1480	18	5	18x5	0	0
Site2	2	5	31	5	7	V1771	5	17	5x17	0	1
Site2	2	5	32	5	8	V1396	18	5	18x5	1	0
Site2	2	5	33	5	9	V1806	12	5	12x5	0	0
Site2	2	5	36	5	12	V1432	18	5	18x5	0	1
Site2	2	5	37	5	13	V1292	9	22	9x22	1	0
Site2	2	5	38	5	14	V1271	9	22	9x22	1	0
Site2	2	5	39	5	15	V1422	18	5	18x5	1	1
Site2	2	5	40	5	16	V1303	9	22	9x22	0	0
Site2	2	5	41	5	17	V1470	18	5	18x5	0	0
Site2	2	5	42	5	18	V1765	14	0	14x.	0	0
Site2	2	5	43	5	19	V1623	5	14	5x14	0	0
Site2	2	5	44	5	20	V1347	18	5	18x5	0	0
Site2	2	5	45	5	21	V1514	5	14	5x14	0	0
Site2	2	5	46	5	22	V1363	18	5	18x5	0	0
Site2	2	5	47	5	23	V1319	18	5	18x5	0	0
Site2	2	5	48	5	24	V1351	18	5	18x5	0	0
Site2	3	5	49	5	1	V1500	14	5	14x5	0	1
Site2	3	5	50	5	2	V1480	18	5	18x5	0	1
Site2	3	5	51	5	3	V1765	14	0	14x.	0	1
Site2	3	5	52	5	4	V1475	18	5	18x5	1	0
Site2	3	5	54	5	6	V1305	9	22	9x22	0	1
Site2	3	5	55	5	7	V1795	21	22	21x22	0	0
Site2	3	5	56	5	8	V1477	18	5	18x5	0	0
Site2	3	5	58	5	10	V1347	18	5	18x5	0	1
Site2	3	5	59	5	11	V1542	5	14	5x14	0	0
Site2	3	5	60	5	12	V1518	5	14	5x14	0	0
Site2	3	5	61	5	13	V1760	5	0	5x.	1	0
Site2	3	5	62	5	14	V1410	18	5	18x5	0	0
Site2	3	5	63	5	15	V1326	18	5	18x5	0	1
Site2	3	5	64	5	16	V1476	18	5	18x5	0	0
Site2	3	5	65	5	17	V1369	18	5	18x5	1	0
Site2	3	5	66	5	18	V1430	18	5	18x5	0	0
Site2	3	5	67	5	19	V1451	18	5	18x5	1	0
Site2	3	5	68	5	20	V1481	18	5	18x5	0	0
Site2	3	5	70	5	22	V875	18	5	18x5	1	0
Site2	3	5	71	5	23	V1377	18	5	18x5	0	0
Site2	3	5	72	5	24	V1399	18	5	18x5	0	0
Site2	4	5	73	5	1	V1646	5	14	5x14	0	0
Site2	4	5	74	5	2	V2	21	6	21x6	1	1
Site2	4	5	75	5	3	V1775	5	20	5x20	0	0
Site2	4	5	77	5	5	V1655	5	14	5x14	0	0
Site2	4	5	78	5	6	V1443	18	5	18x5	0	1
Site2	4	5	79	5	7	V1377	18	5	18x5	0	0
Site2	4	5	80	5	8	V1390	18	5	18x5	0	0
Site2	4	5	81	5	9	V1299	9	22	9x22	0	0
Site2	4	5	82	5	10	V1444	18	5	18x5	0	0
Site2	4	5	83	5	11	V1498	18	5	18x5	0	1
Site2	4	5	84	5	12	V1414	18	5	18x5	0	0
Site2	4	5	85	5	13	V1840	22	0	22x.	0	1
Site2	4	5	86	5	14	V1328	18	5	18x5	0	1
Site2	4	5	87	5	15	V1365	18	5	18x5	0	0
Site2	4	5	89	5	17	V1458	18	5	18x5	0	0
Site2	4	5	90	5	18	V1527	5	14	5x14	0	0
Site2	4	5	91	5	19	V1357	18	5	18x5	0	1
Site2	4	5	92	5	20	V1371	18	5	18x5	0	1
Site2	4	5	93	5	21	V1804	12	0	12x.	0	0
Site2	4	5	95	5	23	V1382	18	5	18x5	0	0
Site2	4	5	96	5	24	V1284	9	22	9x22	0	0
Site2	5	5	98	5	2	V1650	5	14	5x14	0	0
Site2	5	5	99	5	3	V1324	18	5	18x5	0	0
Site2	5	5	100	5	4	V1281	9	22	9x22	0	0
Site2	5	5	101	5	5	V884	20	13	20x13	0	0
Site2	5	5	102	5	6	V1399	18	5	18x5	1	0
Site2	5	5	103	5	7	V1384	18	5	18x5	0	1
Site2	5	5	104	5	8	V1296	9	22	9x22	0	0
Site2	5	5	105	5	9	V1492	18	5	18x5	0	0
Site2	5	5	107	5	11	V1362	18	5	18x5	1	0
Site2	5	5	108	5	12	V1820	21	22	21x22	0	0
Site2	5	5	109	5	13	V1386	18	5	18x5	0	0
Site2	5	5	112	5	16	V1329	18	5	18x5	0	0
Site2	5	5	113	5	17	V1322	18	5	18x5	0	0
Site2	5	5	114	5	18	V1316	9	22	9x22	0	1
Site2	5	5	115	5	19	V1824	18	5	18x5	0	0
Site2	5	5	116	5	20	V8	21	5	21x5	1	0
Site2	5	5	117	5	21	V1328	18	5	18x5	0	0
Site2	5	5	118	5	22	V1836	18	5	18x5	0	1
Site2	5	5	120	5	24	V1602	5	14	5x14	0	0
Site2	6	5	121	5	1	V1318	18	5	18x5	0	0
Site2	6	5	123	5	3	V1280	9	22	9x22	0	0
Site2	6	5	125	5	5	V1375	18	5	18x5	1	1
Site2	6	5	126	5	6	V1347	18	5	18x5	0	0
Site2	6	5	127	5	7	V1794	21	22	21x22	0	0
Site2	6	5	129	5	9	V1802	21	22	21x22	0	1
Site2	6	5	130	5	10	V1315	9	22	9x22	0	0
Site2	6	5	131	5	11	V1361	18	5	18x5	0	0
Site2	6	5	132	5	12	V1459	18	5	18x5	0	0
Site2	6	5	133	5	13	V1376	18	5	18x5	0	1
Site2	6	5	134	5	14	V1299	9	22	9x22	0	0
Site2	6	5	135	5	15	V1509	14	5	14x5	0	0
Site2	6	5	136	5	16	V1622	5	14	5x14	1	1
Site2	6	5	137	5	17	V1351	18	5	18x5	0	1
Site2	6	5	138	5	18	V1556	5	14	5x14	0	1
Site2	6	5	139	5	19	V1796	21	22	21x22	1	0
Site2	6	5	140	5	20	V1797	21	22	21x22	1	0
Site2	6	5	142	5	22	V1476	18	5	18x5	1	1
Site2	6	5	143	5	23	V1428	18	5	18x5	0	1
Site2	1	6	2	6	2	V1396	18	5	18x5	0	1
Site2	1	6	3	6	3	V1784	21	22	21x22	0	1
Site2	1	6	4	6	4	V1808	21	22	21x22	1	0
Site2	1	6	5	6	5	V1561	5	14	5x14	0	1
Site2	1	6	6	6	6	V1761	21	22	21x22	0	0
Site2	1	6	7	6	7	V1473	18	5	18x5	0	1
Site2	1	6	8	6	8	V1284	9	22	9x22	0	0
Site2	1	6	9	6	9	V1388	18	5	18x5	0	1
Site2	1	6	11	6	11	V1289	9	22	9x22	1	1
Site2	1	6	12	6	12	V1831	18	5	18x5	0	1
Site2	1	6	13	6	13	V1494	18	5	18x5	1	1
Site2	1	6	14	6	14	V1420	18	5	18x5	0	0
Site2	1	6	15	6	15	V1283	9	22	9x22	1	0
Site2	1	6	16	6	16	V1293	9	22	9x22	0	0
Site2	1	6	17	6	17	V1760	5	0	5x.	0	0
Site2	1	6	18	6	18	V1469	18	5	18x5	0	1
Site2	1	6	20	6	20	V1487	18	5	18x5	0	1
Site2	1	6	21	6	21	V1408	18	5	18x5	0	1
Site2	1	6	22	6	22	V1649	5	14	5x14	1	0
Site2	1	6	24	6	24	V1546	5	14	5x14	0	1
Site2	2	6	25	6	1	V1489	18	5	18x5	0	0
Site2	2	6	26	6	2	V1389	18	5	18x5	0	0
Site2	2	6	27	6	3	V1293	9	22	9x22	0	0
Site2	2	6	29	6	5	V1797	21	22	21x22	1	0
Site2	2	6	30	6	6	V1775	5	20	5x20	0	1
Site2	2	6	31	6	7	V1822	12	5	12x5	0	0
Site2	2	6	33	6	9	V1433	18	5	18x5	0	0
Site2	2	6	35	6	11	V1290	9	22	9x22	0	1
Site2	2	6	36	6	12	V1352	18	5	18x5	0	0
[truncated: 29,412 more rows]
